# Supplementary material for: Equipment leak detection and quantification at 67 oil and gas sites in the Western United States
Source: Oxford University Press journal article supplement (doi:10.1525/elementa.368), 2019-01-01
Supplement: elementa-7-368-s2.xlsx [file elementa-7-368-s2.xlsx]

## Sheet: Header Descriptions
Sheet	Column	Description	Additional Data Notes
Component Counts	Site ID	Blinded unique site identification code
Component Counts	BasinID	Name of GHGRP Basin for site
Component Counts	Facility Type	Classification of Site based on criteria in Table S1
Component Counts	CompanyID	Blinded unique company identifier
Component Counts	Major Equipment ID	Equipment associated with component counts
Component Counts	Subpart W Major Equipment Classification	Subpart W terminology for equipment associated with component count
Component Counts	Total_Valves	Number of valves associated with piece of equipment from field count
Component Counts	Total_Connectors	Number of connectors associated with piece of equipment from field count
Component Counts	Total_OELs	Number of open-ended lines associated with piece of equipment from field count
Component Counts	Total_PRVs	Number of pressure relief valves associated with piece of equipment from field count
Component Counts	Totat_Flanges	Number of flanges associated with piece of equipment from field count
Component Counts	Total Components	Sum of count of valves, connectors, OELs, PRVs, and flanges
Component Counts	Component Service Type	Service of the counted components	gas or oil
Component Counts	Oil or Gas Site	General classification of the site in which the components were located	gas or oil
Leakers	Site ID	Blinded unique site identification code
Leakers	CompanyID	Blinded unique company identifier
Leakers	BasinID	Name of GHGRP Basin for site
Leakers	Site Category	Classification of Site based on criteria in Table S1
Leakers	Oil or Gas Site	Operator classification of the site in which the components were located	gas or oil
Leakers	Major Equipment ID	Equipment associated with leaking component
Leakers	Subpart W Major Equipment Classification	Subpart W classification of equipment associated with leaking component
Leakers	Component Type	Type of component where leak was identified
Leakers	Component Service	Service of the component identified as leaking	gas or oil
Leakers	Detected with FID/Method 21	Whether the component had a FID screening value exceeding 500 ppm	y = yes, n= no, n/a = site without an FID survey
Leakers	Detected with OGI	Whether the component had visual emissions with a FLIR GF320 camera screening	y=yes, n=no
Leakers	Measured Emission Rate (scfm)	Measured emission rate in standard cubic feet per minute
Leakers	FID Screening Value (ppm)	FID screening value for leaking components in the study identified with that method
Leakers	Instrument Response Factor Used in Corrections	Response factor used to correct the HiFlow measurement
Leakers	Measured Emission Rate (scfh) used in Main Study Analyses	Measured emission rate with high volume sampler in standard cubic feet per hour	Basis for calculations
Leakers	Site Component Count Available	Indicator of whether field team counted the number of components on the site
Leakers	Leak Detected Using Method	Descriptor for which detection methods identified the leak
Leakers	High-volume Sampler Used in Measurement	Indication of which high volume sampler was used for which measurement
Leakers	QA Instrument in Instrument Exhaust	Indication of which backup concentration measurement was used for each Baccarach high flow measurement	n/a for Indaco sampler
Leakers	Instrument Used for Final Concentration Input into Emission Calculation	Which concentration measurement was used for quantification of the leak
Leakers	Transitional Failure	flag (x) for Baccarach transition issue with measurement
Leakers	CH4%	Percent methane in company provided gas sample
Leakers	C2H6%	Percent ethane in company provided gas sample
Leakers	C3H8%	Percent propane in company provided gas sample
Leakers	C4H10%	Percent butane in company provided gas sample
Leakers	HF Concentration Reading (%Gas)	high volume sampler concentration reading in percent gas
Leakers	QA Instrument Concentration Reading (%Gas)	QA instrument sampler concentration reading in percent gas
Leakers	Final Concentration Reading (%Gas)	concentration reading used in final emission calculation
Leakers	Uncorrected Whole Gas Emission Rate (scfh)	emission estimate without correction factors applied

## Sheet: Component Counts
Site ID	BasinID	Facility Type	CompanyID	Major Equipment ID	Subpart W Major Equipment Classification	Total_Valves	Total_Connectors	Total_OELs	Total_PRVs	Totat_Flanges	Total Components	Component Service Type	Oil or Gas Site
GHD0001	San Juan	Well Production	008	Wellhead	Wellhead	12	60	1	0	8	81	gas	Gas
GHD0001	San Juan	Well Production	008	Separator	Separator	11	127	1	2	2	143	gas	Gas
GHD0002	San Juan	Well Production	008	Wellhead	Wellhead	18	88	0	0	7	113	gas	Gas
GHD0002	San Juan	Well Production	008	Separator	Separator	8	90	0	1	0	99	gas	Gas
GHD0002	San Juan	Well Production	008	Dehydrator	Dehydrator	122	10	0	0	0	132	gas	Gas
GHD0002	San Juan	Well Production	008	Compressor	Compressor	0	69	0	3	10	82	gas	Gas
GHD0003	San Juan	Central Production	008	Wellhead	Wellhead	23	85	4	0	25	137	gas	Oil
GHD0003	San Juan	Central Production	008	Separator	Separator	9	256	0	6	2	273	gas	Oil
GHD0003	San Juan	Central Production	008	Wellhead	Wellhead	19	54	6	0	23	102	gas	Oil
GHD0003	San Juan	Central Production	008	Separator	Separator	31	221	0	1	20	273	gas	Oil
GHD0003	San Juan	Central Production	008	Compressor	Compressor	16	152	2	3	28	201	gas	Oil
GHD0003	San Juan	Central Production	008	Meters/Piping	Meters/Piping	16	20	8	1	18	63	gas	Oil
GHD0003	San Juan	Central Production	008	Meters/Piping	Meters/Piping	14	31	0	1	20	66	gas	Oil
GHD0003	San Juan	Central Production	008	Heater Treater	Heater Treater	27	210	0	0	32	269	gas	Oil
GHD0003	San Juan	Central Production	008	Heater Treater	Heater Treater	8	38	0	3	23	72	oil	Oil
GHD0003	San Juan	Central Production	008	Heater Treater	Heater Treater	27	210	0	0	32	269	gas	Oil
GHD0003	San Juan	Central Production	008	Heater Treater	Heater Treater	8	38	0	3	23	72	oil	Oil
GHD0003	San Juan	Central Production	008	Meters/Piping	Meters/Piping	51	75	8	0	46	180	gas	Oil
GHD0004	San Juan	Central Production	008	Wellhead	Wellhead	7	33	1	0	34	75	gas	Oil
GHD0004	San Juan	Central Production	008	Compressor	Compressor	14	117	2	1	59	193	gas	Oil
GHD0004	San Juan	Central Production	008	Storage Vessel	Other	7	153	32	1	47	240	gas	Oil
GHD0004	San Juan	Central Production	008	Meters/Piping	Meters/Piping	16	0	4	0	21	41	gas	Oil
GHD0004	San Juan	Central Production	008	Wellhead	Wellhead	30	22	3	0	39	94	gas	Oil
GHD0004	San Juan	Central Production	008	Wellhead	Wellhead	25	22	4	0	29	80	gas	Oil
GHD0004	San Juan	Central Production	008	Separator	Separator	20	64	2	1	20	107	gas	Oil
GHD0004	San Juan	Central Production	008	Separator	Separator	5	26	0	0	0	31	oil	Oil
GHD0004	San Juan	Central Production	008	Heater Treater	Heater Treater	23	22	0	2	29	76	gas	Oil
GHD0004	San Juan	Central Production	008	Heater Treater	Heater Treater	20	60	0	0	19	99	oil	Oil
GHD0004	San Juan	Central Production	008	Heater Treater	Heater Treater	27	111	0	0	29	167	gas	Oil
GHD0004	San Juan	Central Production	008	Heater Treater	Heater Treater	13	49	0	0	15	77	oil	Oil
GHD0004	San Juan	Central Production	008	Meters/Piping	Meters/Piping	13	23	8	0	21	65	gas	Oil
GHD0004	San Juan	Central Production	008	Meters/Piping	Meters/Piping	21	39	7	1	37	105	gas	Oil
GHD0005	San Juan	Central Production	003	Wellhead	Wellhead	10	69	4	0	5	88	gas	Gas
GHD0005	San Juan	Central Production	003	Separator	Separator	11	120	4	0	0	135	gas	Gas
GHD0005	San Juan	Central Production	003	Separator	Separator	0	11	0	0	0	11	oil	Gas
GHD0005	San Juan	Central Production	003	Separator	Separator	20	73	3	0	22	118	gas	Gas
GHD0005	San Juan	Central Production	003	Separator	Separator	5	0	0	0	0	5	oil	Gas
GHD0005	San Juan	Central Production	003	Separator	Separator	14	94	5	2	7	122	gas	Gas
GHD0005	San Juan	Central Production	003	Dehydrator	Dehydrator	15	147	3	3	10	178	gas	Gas
GHD0005	San Juan	Central Production	003	Compressor	Compressor	11	36	4	1	59	111	gas	Gas
GHD0005	San Juan	Central Production	003	Storage Vessel	Other	3	64	5	1	0	73	gas	Gas
GHD0005	San Juan	Central Production	003	Compressor	Compressor	11	36	4	1	59	111	gas	Gas
GHD0006	San Juan	Well Site	003	Wellhead	Wellhead	13	56	2	0	9	80	gas	Gas
GHD0006	San Juan	Well Site	003	Separator	Separator	12	52	0	3	13	80	gas	Gas
GHD0006	San Juan	Well Site	003	Separator	Separator	9	73	0	0	0	82	oil	Gas
GHD0006	San Juan	Well Site	003	Meters/Piping	Meters/Piping	0	2	1	0	0	3	gas	Gas
GHD0006	San Juan	Well Site	003	Meters/Piping	Meters/Piping	2	0	0	0	2	4	oil	Gas
GHD0006	San Juan	Well Site	003	Compressor	Compressor	4	63	3	3	16	89	gas	Gas
GHD0007	San Juan	Well Site	003	Wellhead	Wellhead	13	34	6	0	11	64	gas	Gas
GHD0007	San Juan	Well Site	003	Compressor	Compressor	15	115	2	3	19	154	gas	Gas
GHD0007	San Juan	Well Site	003	Separator	Separator	7	31	0	0	6	44	gas	Gas
GHD0007	San Juan	Well Site	003	Separator	Separator	3	35	2	0	0	40	oil	Gas
GHD0007	San Juan	Well Site	003	Separator	Separator	19	57	9	0	16	101	gas	Gas
GHD0007	San Juan	Well Site	003	Separator	Separator	12	63	0	1	0	76	oil	Gas
GHD0007	San Juan	Well Site	003	Meters/Piping	Meters/Piping	1	2	0	2	4	9	gas	Gas
GHD0008	San Juan	Boosting and Gathering	003	Compressor	Compressor	6	107	10	0	54	177	gas	Gas
GHD0008	San Juan	Boosting and Gathering	003	Compressor	Compressor	6	107	10	0	54	177	gas	Gas
GHD0008	San Juan	Boosting and Gathering	003	Separator	Separator	14	106	7	0	27	154	gas	Gas
GHD0008	San Juan	Boosting and Gathering	003	Separator	Separator	14	106	7	0	27	154	gas	Gas
GHD0008	San Juan	Boosting and Gathering	003	Meters/Piping	Meters/Piping	17	81	5	0	22	125	gas	Gas
GHD0008	San Juan	Boosting and Gathering	003	Heater	Other	12	218	4	1	6	241	gas	Gas
GHD0008	San Juan	Boosting and Gathering	003	Heater	Other	12	218	4	1	6	241	gas	Gas
GHD0008	San Juan	Boosting and Gathering	003	Separator	Separator	14	106	7	0	27	154	gas	Gas
GHD0008	San Juan	Boosting and Gathering	003	Separator	Separator	14	106	7	0	27	154	gas	Gas
GHD0009	San Juan	Well Site	005	Wellhead	Wellhead	21	77	3	0	14	115	gas	Gas
GHD0009	San Juan	Well Site	005	Compressor	Compressor	12	60	0	11	35	118	gas	Gas
GHD0009	San Juan	Well Site	005	Meters/Piping	Meters/Piping	38	224	0	1	12	275	gas	Gas
GHD0009	San Juan	Well Site	005	Separator	Separator	29	87	0	2	0	118	gas	Gas
GHD0009	San Juan	Well Site	005	Storage Vessel	Other	21	219	11	1	16	268	gas	Gas
GHD0011	San Juan	Well Site	005	VRU Compressor	Compressor	9	31	6	2	14	62	gas	Oil
GHD0011	San Juan	Well Site	005	Wellhead	Wellhead	22	92	1	0	8	123	gas	Oil
GHD0011	San Juan	Well Site	005	Heater Treater	Heater Treater	12	65	4	4	5	90	gas	Oil
GHD0011	San Juan	Well Site	005	Heater Treater	Heater Treater	2	0	0	0	4	6	oil	Oil
GHD0011	San Juan	Well Site	005	Oil Heater	Inline Heater	7	47	0	1	0	55	gas	Oil
GHD0011	San Juan	Well Site	005	Oil Heater	Inline Heater	1	0	0	0	0	1	oil	Oil
GHD0011	San Juan	Well Site	005	Oil Heater	Inline Heater	7	47	0	1	0	55	gas	Oil
GHD0011	San Juan	Well Site	005	Oil Heater	Inline Heater	1	0	0	0	0	1	oil	Oil
GHD0011	San Juan	Well Site	005	Oil Heater	Inline Heater	7	47	0	1	0	55	gas	Oil
GHD0011	San Juan	Well Site	005	Oil Heater	Inline Heater	1	0	0	0	0	1	oil	Oil
GHD0011	San Juan	Well Site	005	Oil Heater	Inline Heater	7	47	0	1	0	55	gas	Oil
GHD0011	San Juan	Well Site	005	Oil Heater	Inline Heater	1	0	0	0	0	1	oil	Oil
GHD0011	San Juan	Well Site	005	Oil Heater	Inline Heater	7	47	0	1	0	55	gas	Oil
GHD0011	San Juan	Well Site	005	Oil Heater	Inline Heater	1	0	0	0	0	1	oil	Oil
GHD0011	San Juan	Well Site	005	Oil Heater	Inline Heater	7	47	0	1	0	55	gas	Oil
GHD0011	San Juan	Well Site	005	Oil Heater	Inline Heater	1	0	0	0	0	1	oil	Oil
GHD0011	San Juan	Well Site	005	Compressor	Compressor	12	101	6	5	15	139	gas	Oil
GHD0011	San Juan	Well Site	005	Wellhead	Wellhead	22	92	1	0	8	123	gas	Oil
GHD0011	San Juan	Well Site	005	Compressor	Compressor	6	121	6	5	54	192	gas	Oil
GHD0011	San Juan	Well Site	005	Meters/Piping	Meters/Piping	6	54	10	0	6	76	gas	Oil
GHD0011	San Juan	Well Site	005	Meters/Piping	Meters/Piping	6	54	10	0	6	76	gas	Oil
GHD0011	San Juan	Well Site	005	Meters/Piping	Meters/Piping	16	109	0	0	10	135	gas	Oil
GHD0011	San Juan	Well Site	005	Separator	Separator	3	61	6	1	1	72	gas	Oil
GHD0011	San Juan	Well Site	005	Separator	Separator	3	39	0	0	2	44	oil	Oil
GHD0011	San Juan	Well Site	005	Separator	Separator	3	61	6	1	1	72	gas	Oil
GHD0011	San Juan	Well Site	005	Separator	Separator	3	39	0	0	2	44	oil	Oil
GHD0011	San Juan	Well Site	005	Heater Treater	Heater Treater	12	65	4	4	5	90	gas	Oil
GHD0011	San Juan	Well Site	005	Heater Treater	Heater Treater	2	0	0	0	4	6	oil	Oil
GHD0013	Gulf Coast	Well Site	007	Wellhead	Wellhead	26	84	1	2	14	127	gas	Gas
GHD0013	Gulf Coast	Well Site	007	Wellhead	Wellhead	26	79	1	2	11	119	gas	Gas
GHD0013	Gulf Coast	Well Site	007	Wellhead	Wellhead	24	68	1	2	12	107	gas	Gas
GHD0013	Gulf Coast	Well Site	007	Separator	Separator	57	78	0	6	56	197	gas	Gas
GHD0013	Gulf Coast	Well Site	007	Separator	Separator	32	78	1	1	29	141	oil	Gas
GHD0013	Gulf Coast	Well Site	007	Separator	Separator	57	78	0	6	56	197	gas	Gas
GHD0013	Gulf Coast	Well Site	007	Separator	Separator	32	78	1	1	29	141	oil	Gas
GHD0013	Gulf Coast	Well Site	007	Separator	Separator	57	78	0	6	56	197	gas	Gas
GHD0013	Gulf Coast	Well Site	007	Separator	Separator	32	78	1	1	29	141	oil	Gas
GHD0013	Gulf Coast	Well Site	007	Separator	Separator	29	260	0	2	2	293	gas	Gas
GHD0013	Gulf Coast	Well Site	007	Meters/Piping	Meters/Piping	10	17	0	0	14	41	gas	Gas
GHD0014	Gulf Coast	Central Production	007	Storage Vessel	Other	17	276	6	1	0	300	oil	Gas
GHD0014	Gulf Coast	Central Production	007	Wellhead	Wellhead	25	89	8	1	32	155	gas	Gas
GHD0014	Gulf Coast	Central Production	007	Separator	Separator	54	174	1	3	44	276	gas	Gas
GHD0014	Gulf Coast	Central Production	007	Separator	Separator	15	48	1	1	17	82	oil	Gas
GHD0014	Gulf Coast	Central Production	007	Separator	Separator	23	138	0	0	4	165	gas	Gas
GHD0014	Gulf Coast	Central Production	007	Separator	Separator	10	60	1	0	0	71	oil	Gas
GHD0014	Gulf Coast	Central Production	007	Meters/Piping	Meters/Piping	15	47	0	0	15	77	gas	Gas
GHD0014	Gulf Coast	Central Production	007	Meters/Piping	Meters/Piping	17	70	0	1	13	101	oil	Gas
GHD0014	Gulf Coast	Central Production	007	Meters/Piping	Meters/Piping	29	195	3	2	18	247	gas	Gas
GHD0014	Gulf Coast	Central Production	007	Meters/Piping	Meters/Piping	20	75	0	2	24	121	oil	Gas
GHD0014	Gulf Coast	Central Production	007	Meters/Piping	Meters/Piping	23	63	0	0	49	135	gas	Gas
GHD0014	Gulf Coast	Central Production	007	Meters/Piping	Meters/Piping	13	9	0	0	32	54	oil	Gas
GHD0015	Gulf Coast	Well Site	007	Wellhead	Wellhead	32	98	0	1	15	146	gas	Oil
GHD0015	Gulf Coast	Well Site	007	Wellhead	Wellhead	32	98	0	1	15	146	gas	Oil
GHD0015	Gulf Coast	Well Site	007	Separator	Separator	53	108	1	4	46	212	gas	Oil
GHD0015	Gulf Coast	Well Site	007	Separator	Separator	22	44	1	1	29	97	oil	Oil
GHD0015	Gulf Coast	Well Site	007	Separator	Separator	53	108	1	4	46	212	gas	Oil
GHD0015	Gulf Coast	Well Site	007	Separator	Separator	22	44	1	1	29	97	oil	Oil
GHD0015	Gulf Coast	Well Site	007	Separator	Separator	24	127	0	2	0	153	gas	Oil
GHD0015	Gulf Coast	Well Site	007	Separator	Separator	10	0	1	0	0	11	oil	Oil
GHD0015	Gulf Coast	Well Site	007	Pig Station	Meters/Piping	15	0	0	1	13	29	gas	Oil
GHD0016	Gulf Coast	Well Site	007	Separator	Separator	34	257	6	2	3	302	gas	Gas
GHD0016	Gulf Coast	Well Site	007	Separator	Separator	10	71	0	1	0	82	oil	Gas
GHD0016	Gulf Coast	Well Site	007	Meters/Piping	Meters/Piping	11	34	1	0	9	55	gas	Gas
GHD0016	Gulf Coast	Well Site	007	Meters/Piping	Meters/Piping	25	55	2	1	23	106	gas	Gas
GHD0016	Gulf Coast	Well Site	007	Separator	Separator	40	161	2	1	47	251	gas	Gas
GHD0016	Gulf Coast	Well Site	007	Separator	Separator	10	54	1	1	16	82	oil	Gas
GHD0016	Gulf Coast	Well Site	007	Sulphur Treater	Other	15	54	0	1	19	89	gas	Gas
GHD0016	Gulf Coast	Well Site	007	Sulphur Treater	Other	21	41	1	1	11	75	gas	Gas
GHD0016	Gulf Coast	Well Site	007	Separator	Separator	19	133	0	1	5	158	gas	Gas
GHD0016	Gulf Coast	Well Site	007	Separator	Separator	10	31	1	1	0	43	oil	Gas
GHD0016	Gulf Coast	Well Site	007	Wellhead	Wellhead	19	67	1	1	12	100	gas	Gas
GHD0016	Gulf Coast	Well Site	007	Wellhead	Wellhead	14	68	1	1	0	84	oil	Gas
GHD0016	Gulf Coast	Well Site	007	Meters/Piping	Meters/Piping	9	8	3	1	15	36	gas	Gas
GHD0016	Gulf Coast	Well Site	007	Compressor	Compressor	50	419	0	1	67	537	gas	Gas
GHD0016	Gulf Coast	Well Site	007	Compressor	Compressor	50	419	0	1	67	537	gas	Gas
GHD0016	Gulf Coast	Well Site	007	Compressor	Compressor	27	875	0	6	23	931	gas	Gas
GHD0016	Gulf Coast	Well Site	007	Storage Vessel	Other	0	0	1	0	1	2	gas	Gas
GHD0016	Gulf Coast	Well Site	007	Storage Vessel	Other	0	0	1	0	0	1	gas	Gas
GHD0017	Gulf Coast	Boosting and Gathering	007	Separator	Separator	45	177	0	3	45	270	gas	Gas
GHD0017	Gulf Coast	Boosting and Gathering	007	Separator	Separator	24	125	2	2	13	166	oil	Gas
GHD0017	Gulf Coast	Boosting and Gathering	007	Separator	Separator	41	164	0	2	38	245	gas	Gas
GHD0017	Gulf Coast	Boosting and Gathering	007	Separator	Separator	27	113	2	1	14	157	oil	Gas
GHD0017	Gulf Coast	Boosting and Gathering	007	Separator	Separator	41	129	0	2	39	211	gas	Gas
GHD0017	Gulf Coast	Boosting and Gathering	007	Separator	Separator	27	131	2	1	10	171	oil	Gas
GHD0017	Gulf Coast	Boosting and Gathering	007	Separator	Separator	41	136	1	3	44	225	gas	Gas
GHD0017	Gulf Coast	Boosting and Gathering	007	Separator	Separator	31	127	2	2	14	176	oil	Gas
GHD0017	Gulf Coast	Boosting and Gathering	007	Separator	Separator	29	214	0	2	0	245	gas	Gas
GHD0017	Gulf Coast	Boosting and Gathering	007	Separator	Separator	0	105	1	1	0	107	oil	Gas
GHD0017	Gulf Coast	Boosting and Gathering	007	Meters/Piping	Meters/Piping	28	10	0	0	54	92	gas	Gas
GHD0017	Gulf Coast	Boosting and Gathering	007	Meters/Piping	Meters/Piping	60	44	0	0	117	221	oil	Gas
GHD0017	Gulf Coast	Boosting and Gathering	007	Meters/Piping	Meters/Piping	34	74	0	2	46	156	gas	Gas
GHD0017	Gulf Coast	Boosting and Gathering	007	Storage Vessel	Other	3	73	0	0	3	79	oil	Gas
GHD0018	Gulf Coast	Boosting and Gathering	007	Separator	Separator	44	0	1	3	40	88	gas	Gas
GHD0018	Gulf Coast	Boosting and Gathering	007	Separator	Separator	30	0	0	2	18	50	oil	Gas
GHD0018	Gulf Coast	Boosting and Gathering	007	Separator	Separator	42	0	0	3	46	91	gas	Gas
GHD0018	Gulf Coast	Boosting and Gathering	007	Separator	Separator	34	0	0	2	17	53	oil	Gas
GHD0018	Gulf Coast	Boosting and Gathering	007	Separator	Separator	36	138	0	3	40	217	gas	Gas
GHD0018	Gulf Coast	Boosting and Gathering	007	Separator	Separator	23	93	2	2	15	135	oil	Gas
GHD0018	Gulf Coast	Boosting and Gathering	007	Separator	Separator	34	228	1	3	2	268	gas	Gas
GHD0018	Gulf Coast	Boosting and Gathering	007	Separator	Separator	11	78	2	1	0	92	oil	Gas
GHD0018	Gulf Coast	Boosting and Gathering	007	Separator	Separator	14	0	2	7	0	23	gas	Gas
GHD0018	Gulf Coast	Boosting and Gathering	007	Separator	Separator	3	0	0	0	0	3	oil	Gas
GHD0018	Gulf Coast	Boosting and Gathering	007	Pig Station	Meters/Piping	18	37	0	0	15	70	gas	Gas
GHD0018	Gulf Coast	Boosting and Gathering	007	Pig Station	Meters/Piping	18	71	0	0	15	104	oil	Gas
GHD0018	Gulf Coast	Boosting and Gathering	007	Meters/Piping	Meters/Piping	37	125	0	2	46	210	gas	Gas
GHD0018	Gulf Coast	Boosting and Gathering	007	Meters/Piping	Meters/Piping	44	78	0	2	74	198	oil	Gas
GHD0018	Gulf Coast	Boosting and Gathering	007	Storage Vessel	Other	4	56	0	1	2	63	oil	Gas
GHD0019	Gulf Coast	Well Site	005	Sweetener Scrubber	MinorSeparator	50	121	0	1	20	192	gas	Oil
GHD0019	Gulf Coast	Well Site	005	Meters/Piping	Meters/Piping	27	0	0	1	21	49	gas	Oil
GHD0019	Gulf Coast	Well Site	005	Separator	Separator	33	41	0	1	27	102	gas	Oil
GHD0019	Gulf Coast	Well Site	005	Separator	Separator	11	48	0	0	3	62	oil	Oil
GHD0019	Gulf Coast	Well Site	005	Separator	Separator	33	41	0	1	27	102	gas	Oil
GHD0019	Gulf Coast	Well Site	005	Separator	Separator	11	48	0	0	3	62	oil	Oil
GHD0019	Gulf Coast	Well Site	005	VRU Compressor	Compressor	14	140	0	5	4	163	gas	Oil
GHD0019	Gulf Coast	Well Site	005	VRU Compressor	Compressor	14	142	0	5	4	165	gas	Oil
GHD0019	Gulf Coast	Well Site	005	VRT	Separator	3	0	0	1	4	8	gas	Oil
GHD0019	Gulf Coast	Well Site	005	VRT	Separator	9	8	0	0	15	32	oil	Oil
GHD0019	Gulf Coast	Well Site	005	VRT	Separator	6	47	0	0	6	59	gas	Oil
GHD0019	Gulf Coast	Well Site	005	VRT	Separator	4	10	0	0	16	30	oil	Oil
GHD0019	Gulf Coast	Well Site	005	Heater Treater	Heater Treater	19	0	0	5	10	34	gas	Oil
GHD0019	Gulf Coast	Well Site	005	Heater Treater	Heater Treater	9	4	0	0	27	40	oil	Oil
GHD0019	Gulf Coast	Well Site	005	Heater Treater	Heater Treater	19	0	0	5	11	35	gas	Oil
GHD0019	Gulf Coast	Well Site	005	Heater Treater	Heater Treater	9	4	0	0	26	39	oil	Oil
GHD0019	Gulf Coast	Well Site	005	Meters/Piping	Meters/Piping	19	31	0	0	30	80	gas	Oil
GHD0019	Gulf Coast	Well Site	005	Meters/Piping	Meters/Piping	13	94	0	0	81	188	gas	Oil
GHD0019	Gulf Coast	Well Site	005	Meters/Piping	Meters/Piping	10	0	0	0	42	52	oil	Oil
GHD0019	Gulf Coast	Well Site	005	Meters/Piping	Meters/Piping	12	0	0	0	31	43	gas	Oil
GHD0019	Gulf Coast	Well Site	005	Meters/Piping	Meters/Piping	16	31	0	0	17	64	gas	Oil
GHD0019	Gulf Coast	Well Site	005	Meters/Piping	Meters/Piping	20	31	0	0	30	81	gas	Oil
GHD0019	Gulf Coast	Well Site	005	Compressor	Compressor	55	70	0	2	54	181	gas	Oil
GHD0019	Gulf Coast	Well Site	005	Compressor	Compressor	42	202	0	4	63	311	gas	Oil
GHD0019	Gulf Coast	Well Site	005	Wellhead	Wellhead	30	23	0	0	23	76	gas	Oil
GHD0019	Gulf Coast	Well Site	005	Wellhead	Wellhead	30	50	0	0	23	103	gas	Oil
GHD0019	Gulf Coast	Well Site	005	Separator	Separator	30	40	0	1	35	106	gas	Oil
GHD0019	Gulf Coast	Well Site	005	Separator	Separator	10	47	0	0	3	60	oil	Oil
GHD0019	Gulf Coast	Well Site	005	Separator	Separator	37	40	0	1	35	113	gas	Oil
GHD0019	Gulf Coast	Well Site	005	Separator	Separator	10	47	0	0	3	60	oil	Oil
GHD0019	Gulf Coast	Well Site	005	Storage Vessel	Other	9	23	0	2	40	74	oil	Oil
GHD0020	Gulf Coast	Boosting and Gathering	005	Separator	Separator	23	59	0	1	14	97	gas	Oil
GHD0020	Gulf Coast	Boosting and Gathering	005	Separator	Separator	14	65	0	0	1	80	oil	Oil
GHD0020	Gulf Coast	Boosting and Gathering	005	Heater Treater	Heater Treater	25	41	0	1	5	72	gas	Oil
GHD0020	Gulf Coast	Boosting and Gathering	005	Heater Treater	Heater Treater	10	89	0	1	4	104	oil	Oil
GHD0020	Gulf Coast	Boosting and Gathering	005	VRT	Separator	5	10	0	2	5	22	gas	Oil
GHD0020	Gulf Coast	Boosting and Gathering	005	VRT	Separator	0	30	0	0	0	30	oil	Oil
GHD0020	Gulf Coast	Boosting and Gathering	005	Sweetener Scrubber	MinorSeparator	20	34	0	1	21	76	gas	Oil
GHD0020	Gulf Coast	Boosting and Gathering	005	Fuel Gas Scrubber	MinorSeparator	23	83	0	2	6	114	gas	Oil
GHD0020	Gulf Coast	Boosting and Gathering	005	Meters/Piping	Meters/Piping	15	43	0	0	9	67	gas	Oil
GHD0020	Gulf Coast	Boosting and Gathering	005	Meters/Piping	Meters/Piping	48	161	0	0	1	210	oil	Oil
GHD0020	Gulf Coast	Boosting and Gathering	005	Header	Header	19	25	0	0	13	57	gas	Oil
GHD0020	Gulf Coast	Boosting and Gathering	005	Meters/Piping	Meters/Piping	12	12	0	0	15	39	gas	Oil
GHD0020	Gulf Coast	Boosting and Gathering	005	Meters/Piping	Meters/Piping	11	72	0	0	8	91	gas	Oil
GHD0021	Gulf Coast	Boosting and Gathering	005	Separator	Separator	10	25	0	2	21	58	gas	Oil
GHD0021	Gulf Coast	Boosting and Gathering	005	Separator	Separator	41	95	0	0	35	171	oil	Oil
GHD0021	Gulf Coast	Boosting and Gathering	005	Heater Treater	Heater Treater	14	0	0	1	12	27	gas	Oil
GHD0021	Gulf Coast	Boosting and Gathering	005	Heater Treater	Heater Treater	9	46	0	0	31	86	oil	Oil
GHD0021	Gulf Coast	Boosting and Gathering	005	Heater Treater	Heater Treater	13	0	0	1	12	26	gas	Oil
GHD0021	Gulf Coast	Boosting and Gathering	005	Heater Treater	Heater Treater	9	46	0	0	31	86	oil	Oil
GHD0021	Gulf Coast	Boosting and Gathering	005	Heater Treater	Heater Treater	13	0	0	1	12	26	gas	Oil
GHD0021	Gulf Coast	Boosting and Gathering	005	Heater Treater	Heater Treater	9	46	0	0	31	86	oil	Oil
GHD0021	Gulf Coast	Boosting and Gathering	005	Heater Treater	Heater Treater	13	0	0	1	12	26	gas	Oil
GHD0021	Gulf Coast	Boosting and Gathering	005	Heater Treater	Heater Treater	9	46	0	0	31	86	oil	Oil
GHD0021	Gulf Coast	Boosting and Gathering	005	VRT	Separator	0	0	0	0	4	4	gas	Oil
GHD0021	Gulf Coast	Boosting and Gathering	005	VRT	Separator	9	0	0	0	15	24	oil	Oil
GHD0021	Gulf Coast	Boosting and Gathering	005	Heater	Other	15	126	0	2	4	147	gas	Oil
GHD0021	Gulf Coast	Boosting and Gathering	005	Cooling Unit	Other	6	66	0	3	8	83	oil	Oil
GHD0021	Gulf Coast	Boosting and Gathering	005	Compressor	Compressor	23	132	0	4	40	199	gas	Oil
GHD0021	Gulf Coast	Boosting and Gathering	005	Compressor	Compressor	14	112	0	4	44	174	gas	Oil
GHD0021	Gulf Coast	Boosting and Gathering	005	Compressor	Compressor	24	79	0	4	27	134	gas	Oil
GHD0021	Gulf Coast	Boosting and Gathering	005	Separator	Separator	13	24	0	1	22	60	gas	Oil
GHD0021	Gulf Coast	Boosting and Gathering	005	Separator	Separator	34	89	0	0	37	160	oil	Oil
GHD0021	Gulf Coast	Boosting and Gathering	005	VRU	Compressor	9	54	0	3	35	101	gas	Oil
GHD0021	Gulf Coast	Boosting and Gathering	005	VRU	Compressor	9	173	0	4	8	194	gas	Oil
GHD0021	Gulf Coast	Boosting and Gathering	005	VRU	Compressor	9	173	0	4	8	194	gas	Oil
GHD0021	Gulf Coast	Boosting and Gathering	005	Meters/Piping	Meters/Piping	15	25	0	0	15	55	gas	Oil
GHD0021	Gulf Coast	Boosting and Gathering	005	Meters/Piping	Meters/Piping	13	20	0	0	16	49	gas	Oil
GHD0021	Gulf Coast	Boosting and Gathering	005	Header	Header	34	0	0	0	99	133	gas	Oil
GHD0021	Gulf Coast	Boosting and Gathering	005	Header	Header	29	0	0	0	0	29	oil	Oil
GHD0021	Gulf Coast	Boosting and Gathering	005	Header	Header	39	10	0	0	116	165	gas	Oil
GHD0021	Gulf Coast	Boosting and Gathering	005	Header	Header	43	0	0	0	0	43	oil	Oil
GHD0021	Gulf Coast	Boosting and Gathering	005	Pig Station	Meters/Piping	10	13	0	0	11	34	gas	Oil
GHD0021	Gulf Coast	Boosting and Gathering	005	Pig Station	Meters/Piping	10	9	0	0	14	33	gas	Oil
GHD0021	Gulf Coast	Boosting and Gathering	005	Pig Station	Meters/Piping	2	0	0	0	0	2	oil	Oil
GHD0021	Gulf Coast	Boosting and Gathering	005	Pig Station	Meters/Piping	8	8	0	0	13	29	gas	Oil
GHD0021	Gulf Coast	Boosting and Gathering	005	Pig Station	Meters/Piping	3	0	0	0	0	3	oil	Oil
GHD0021	Gulf Coast	Boosting and Gathering	005	Separator	Separator	20	8	0	1	37	66	gas	Oil
GHD0021	Gulf Coast	Boosting and Gathering	005	Separator	Separator	35	57	0	0	35	127	oil	Oil
GHD0021	Gulf Coast	Boosting and Gathering	005	Flare	Other	14	71	0	0	22	107	gas	Oil
GHD0021	Gulf Coast	Boosting and Gathering	005	Header	Header	60	15	0	0	104	179	gas	Oil
GHD0021	Gulf Coast	Boosting and Gathering	005	Header	Header	10	0	0	0	0	10	oil	Oil
GHD0021	Gulf Coast	Boosting and Gathering	005	Separator	Separator	12	4	0	1	25	42	gas	Oil
GHD0021	Gulf Coast	Boosting and Gathering	005	Separator	Separator	33	99	0	0	34	166	oil	Oil
GHD0021	Gulf Coast	Boosting and Gathering	005	Separator	Separator	26	6	0	1	36	69	gas	Oil
GHD0021	Gulf Coast	Boosting and Gathering	005	Separator	Separator	34	57	0	0	40	131	oil	Oil
GHD0021	Gulf Coast	Boosting and Gathering	005	Separator	Separator	12	4	0	1	25	42	gas	Oil
GHD0021	Gulf Coast	Boosting and Gathering	005	Separator	Separator	26	99	0	0	34	159	oil	Oil
GHD0021	Gulf Coast	Boosting and Gathering	005	Separator	Separator	13	6	0	1	22	42	gas	Oil
GHD0021	Gulf Coast	Boosting and Gathering	005	Separator	Separator	34	89	0	0	37	160	oil	Oil
GHD0021	Gulf Coast	Boosting and Gathering	005	Separator	Separator	20	8	0	1	37	66	gas	Oil
GHD0021	Gulf Coast	Boosting and Gathering	005	Separator	Separator	35	57	0	0	35	127	oil	Oil
GHD0021	Gulf Coast	Boosting and Gathering	005	Separator	Separator	15	6	0	2	26	49	gas	Oil
GHD0021	Gulf Coast	Boosting and Gathering	005	Separator	Separator	42	89	0	0	34	165	oil	Oil
GHD0022	Anadarko	Well Site	007	Wellhead	Wellhead	14	24	0	0	6	44	gas	Gas
GHD0022	Anadarko	Well Site	007	Compressor	Compressor	18	230	2	2	10	262	gas	Gas
GHD0022	Anadarko	Well Site	007	Meters/Piping	Meters/Piping	12	16	1	0	4	33	gas	Gas
GHD0023	Anadarko	Well Site	007	Wellhead	Wellhead	8	12	1	0	2	23	gas	Gas
GHD0023	Anadarko	Well Site	007	Compressor	Compressor	10	75	6	2	8	101	gas	Gas
GHD0023	Anadarko	Well Site	007	Meters/Piping	Meters/Piping	11	11	0	0	4	26	gas	Gas
GHD0024	Anadarko	Well Site	007	Wellhead	Wellhead	16	19	0	0	12	47	gas	Gas
GHD0024	Anadarko	Well Site	007	Compressor	Compressor	8	0	0	0	0	8	gas	Gas
GHD0024	Anadarko	Well Site	007	Compressor	Compressor	15	206	2	1	9	233	gas	Gas
GHD0025	Anadarko	Well Site	007	Wellhead	Wellhead	17	18	0	0	8	43	gas	Gas
GHD0025	Anadarko	Well Site	007	Compressor	Compressor	24	151	0	1	0	176	gas	Gas
GHD0025	Anadarko	Well Site	007	Meters/Piping	Meters/Piping	3	6	0	0	5	14	gas	Gas
GHD0026	Anadarko	Boosting and Gathering	007	Separator	Separator	9	30	0	1	5	45	gas	Gas
GHD0026	Anadarko	Boosting and Gathering	007	Separator	Separator	17	17	0	1	10	45	gas	Gas
GHD0026	Anadarko	Boosting and Gathering	007	Separator	Separator	0	45	0	0	3	48	oil	Gas
GHD0026	Anadarko	Boosting and Gathering	007	Compressor	Compressor	18	109	0	5	79	211	gas	Gas
GHD0026	Anadarko	Boosting and Gathering	007	Compressor	Compressor	34	141	1	2	11	189	gas	Gas
GHD0026	Anadarko	Boosting and Gathering	007	Pig Station	Meters/Piping	25	46	0	0	9	80	gas	Gas
GHD0027	Anadarko	Boosting and Gathering	007	Storage Vessel	Other	28	0	0	0	24	52	oil	Gas
GHD0027	Anadarko	Boosting and Gathering	007	Pig Station	Meters/Piping	26	56	0	0	8	90	gas	Gas
GHD0027	Anadarko	Boosting and Gathering	007	Pig Station	Meters/Piping	31	24	2	2	31	90	gas	Gas
GHD0027	Anadarko	Boosting and Gathering	007	VRU	Compressor	19	3	0	0	3	25	gas	Gas
GHD0027	Anadarko	Boosting and Gathering	007	VRU	Compressor	12	1	1	0	0	14	oil	Gas
GHD0027	Anadarko	Boosting and Gathering	007	Meters/Piping	Meters/Piping	1	0	0	0	0	1	gas	Gas
GHD0027	Anadarko	Boosting and Gathering	007	Meters/Piping	Meters/Piping	15	32	1	1	1	50	oil	Gas
GHD0027	Anadarko	Boosting and Gathering	007	VRU	Compressor	14	60	1	1	7	83	gas	Gas
GHD0027	Anadarko	Boosting and Gathering	007	Separator	Separator	35	34	0	1	8	78	gas	Gas
GHD0027	Anadarko	Boosting and Gathering	007	Separator	Separator	34	66	0	1	9	110	gas	Gas
GHD0027	Anadarko	Boosting and Gathering	007	Storage Vessel	Other	27	13	0	0	10	50	oil	Gas
GHD0027	Anadarko	Boosting and Gathering	007	Storage Vessel	Other	27	15	0	2	3	47	gas	Gas
GHD0027	Anadarko	Boosting and Gathering	007	Storage Vessel	Other	29	15	0	2	3	49	gas	Gas
GHD0027	Anadarko	Boosting and Gathering	007	Compressor	Compressor	40	153	0	8	13	214	gas	Gas
GHD0027	Anadarko	Boosting and Gathering	007	Compressor	Compressor	40	153	0	8	13	214	gas	Gas
GHD0027	Anadarko	Boosting and Gathering	007	Meters/Piping	Meters/Piping	33	130	1	3	24	191	gas	Gas
GHD0028	Anadarko	Well Production	004	Wellhead	Wellhead	31	163	0	0	7	201	gas	Oil
GHD0028	Anadarko	Well Production	004	Separator	Separator	25	180	0	1	0	206	gas	Oil
GHD0028	Anadarko	Well Production	004	Separator	Separator	5	0	0	0	0	5	oil	Oil
GHD0028	Anadarko	Well Production	004	Separator	Separator	15	137	0	0	1	153	gas	Oil
GHD0028	Anadarko	Well Production	004	Separator	Separator	4	37	2	1	2	46	oil	Oil
GHD0028	Anadarko	Well Production	004	Meters/Piping	Meters/Piping	20	0	0	0	5	25	gas	Oil
GHD0028	Anadarko	Well Production	004	Storage Vessel	Other	3	34	0	0	0	37	oil	Oil
GHD0028	Anadarko	Well Production	004	Storage Vessel	Other	4	52	0	1	0	57	oil	Oil
GHD0028	Anadarko	Well Production	004	Flare	Other	9	53	0	1	2	65	gas	Oil
GHD0028	Anadarko	Well Production	004	Flare	Other	0	0	0	0	0	0	oil	Oil
GHD0029	Anadarko	Well Production	004	Meters/Piping	Meters/Piping	19	19	0	0	7	45	gas	Gas
GHD0029	Anadarko	Well Production	004	Separator	Separator	28	111	1	1	0	141	gas	Gas
GHD0029	Anadarko	Well Production	004	Separator	Separator	9	98	0	0	0	107	oil	Gas
GHD0029	Anadarko	Well Production	004	Storage Vessel	Other	3	44	0	0	0	47	oil	Gas
GHD0029	Anadarko	Well Production	004	Wellhead	Wellhead	15	51	0	0	9	75	gas	Gas
GHD0029	Anadarko	Well Production	004	Meters/Piping	Meters/Piping	19	19	0	0	7	45	gas	Gas
GHD0029	Anadarko	Well Production	004	Separator	Separator	28	111	1	1	0	141	gas	Gas
GHD0029	Anadarko	Well Production	004	Separator	Separator	9	98	0	0	0	107	oil	Gas
GHD0029	Anadarko	Well Production	004	Storage Vessel	Other	3	44	0	0	0	47	oil	Gas
GHD0029	Anadarko	Well Production	004	Wellhead	Wellhead	15	56	0	0	9	80	gas	Gas
GHD0029	Anadarko	Well Production	004	Separator	Separator	12	56	0	0	2	70	gas	Gas
GHD0029	Anadarko	Well Production	004	Storage Vessel	Other	3	43	0	0	0	46	oil	Gas
GHD0029	Anadarko	Well Production	004	Storage Vessel	Other	3	43	0	0	0	46	oil	Gas
GHD0030	Anadarko	Well Production	004	Combustor	MinorSeparator	9	92	1	3	4	109	gas	Gas
GHD0030	Anadarko	Well Production	004	Combustor	MinorSeparator	2	0	0	0	0	2	oil	Gas
GHD0030	Anadarko	Well Production	004	Meters/Piping	Meters/Piping	19	26	0	0	4	49	gas	Gas
GHD0030	Anadarko	Well Production	004	Separator	Separator	32	179	0	1	4	216	gas	Gas
GHD0030	Anadarko	Well Production	004	Separator	Separator	7	36	0	0	0	43	oil	Gas
GHD0030	Anadarko	Well Production	004	Storage Vessel	Other	5	34	0	1	1	41	oil	Gas
GHD0030	Anadarko	Well Production	004	Wellhead	Wellhead	14	60	0	0	24	98	gas	Gas
GHD0030	Anadarko	Well Production	004	Storage Vessel	Other	5	34	0	1	1	41	oil	Gas
GHD0030	Anadarko	Well Production	004	Storage Vessel	Other	6	40	0	1	1	48	oil	Gas
GHD0031	Anadarko	Well Production	004	Wellhead	Wellhead	16	44	0	2	9	71	gas	Gas
GHD0031	Anadarko	Well Production	004	Meters/Piping	Meters/Piping	29	43	0	1	13	86	gas	Gas
GHD0031	Anadarko	Well Production	004	Separator	Separator	7	55	0	1	3	66	gas	Gas
GHD0031	Anadarko	Well Production	004	Separator	Separator	2	10	0	0	0	12	oil	Gas
GHD0031	Anadarko	Well Production	004	Separator	Separator	28	187	1	2	9	227	gas	Gas
GHD0031	Anadarko	Well Production	004	Separator	Separator	13	134	0	0	0	147	oil	Gas
GHD0031	Anadarko	Well Production	004	Separator	Separator	22	101	0	2	15	140	gas	Gas
GHD0031	Anadarko	Well Production	004	Compressor	Compressor	22	108	0	6	16	152	gas	Gas
GHD0031	Anadarko	Well Production	004	Storage Vessel	Other	3	37	0	0	0	40	oil	Gas
GHD0031	Anadarko	Well Production	004	Storage Vessel	Other	3	36	0	1	0	40	oil	Gas
GHD0031	Anadarko	Well Production	004	Storage Vessel	Other	2	43	0	0	0	45	oil	Gas
GHD0032	Anadarko	Well Production	004	Wellhead	Wellhead	29	58	0	0	14	101	gas	Gas
GHD0032	Anadarko	Well Production	004	Compressor	Compressor	12	111	0	5	22	150	gas	Gas
GHD0032	Anadarko	Well Production	004	Separator	Separator	22	0	0	2	15	39	gas	Gas
GHD0032	Anadarko	Well Production	004	Meters/Piping	Meters/Piping	27	65	0	0	20	112	gas	Gas
GHD0032	Anadarko	Well Production	004	Meters/Piping	Meters/Piping	28	66	0	1	12	107	gas	Gas
GHD0032	Anadarko	Well Production	004	Heater Treater	Heater Treater	32	109	0	0	9	150	gas	Gas
GHD0032	Anadarko	Well Production	004	Heater Treater	Heater Treater	12	61	0	1	0	74	oil	Gas
GHD0032	Anadarko	Well Production	004	Separator	Separator	7	55	0	2	3	67	gas	Gas
GHD0032	Anadarko	Well Production	004	Separator	Separator	2	10	0	0	0	12	oil	Gas
GHD0032	Anadarko	Well Production	004	Storage Vessel	Other	2	43	0	0	0	45	oil	Gas
GHD0032	Anadarko	Well Production	004	Storage Vessel	Other	3	73	0	1	0	77	oil	Gas
GHD0032	Anadarko	Well Production	004	Storage Vessel	Other	3	73	0	0	0	76	oil	Gas
GHD0033	Anadarko	Well Site	002	Wellhead	Wellhead	22	64	3	0	9	98	gas	Oil
GHD0033	Anadarko	Well Site	002	Heater Treater	Heater Treater	22	113	0	1	0	136	gas	Oil
GHD0033	Anadarko	Well Site	002	Heater Treater	Heater Treater	11	69	0	0	0	80	oil	Oil
GHD0033	Anadarko	Well Site	002	Separator	Separator	22	171	4	2	5	204	gas	Oil
GHD0033	Anadarko	Well Site	002	Separator	Separator	9	65	0	0	3	77	oil	Oil
GHD0033	Anadarko	Well Site	002	Separator	Separator	11	108	1	0	2	122	gas	Oil
GHD0033	Anadarko	Well Site	002	Separator	Separator	7	24	0	0	0	31	oil	Oil
GHD0033	Anadarko	Well Site	002	Storage Vessel	Other	9	155	1	2	1	168	oil	Oil
GHD0033	Anadarko	Well Site	002	Meters/Piping	Meters/Piping	22	58	3	0	14	97	gas	Oil
GHD0034	Anadarko	Well Site	002	Wellhead	Wellhead	28	88	9	0	8	133	gas	Oil
GHD0034	Anadarko	Well Site	002	Heater Treater	Heater Treater	19	225	3	0	2	249	gas	Oil
GHD0034	Anadarko	Well Site	002	Heater Treater	Heater Treater	6	36	0	0	0	42	oil	Oil
GHD0034	Anadarko	Well Site	002	Separator	Separator	20	136	0	1	2	159	gas	Oil
GHD0034	Anadarko	Well Site	002	Separator	Separator	9	30	0	1	2	42	oil	Oil
GHD0034	Anadarko	Well Site	002	Separator	Separator	6	105	1	1	2	115	gas	Oil
GHD0034	Anadarko	Well Site	002	Separator	Separator	4	43	0	0	0	47	oil	Oil
GHD0034	Anadarko	Well Site	002	Meters/Piping	Meters/Piping	29	51	1	0	14	95	gas	Oil
GHD0034	Anadarko	Well Site	002	Storage Vessel	Other	17	233	2	2	10	264	oil	Oil
GHD0035	Anadarko	Well Production	002	Wellhead	Wellhead	23	82	1	0	6	112	gas	Gas
GHD0035	Anadarko	Well Production	002	Separator	Separator	8	54	0	0	6	68	gas	Gas
GHD0035	Anadarko	Well Production	002	Separator	Separator	18	168	0	0	16	202	oil	Gas
GHD0035	Anadarko	Well Production	002	Separator	Separator	19	300	4	0	0	323	gas	Gas
GHD0035	Anadarko	Well Production	002	Separator	Separator	20	138	1	0	0	159	oil	Gas
GHD0035	Anadarko	Well Production	002	Storage Vessel	Other	14	265	1	1	9	290	oil	Gas
GHD0035	Anadarko	Well Production	002	Meters/Piping	Meters/Piping	27	46	0	0	23	96	gas	Gas
GHD0036	Anadarko	Well Production	002	Wellhead	Wellhead	33	86	10	0	20	149	gas	Gas
GHD0036	Anadarko	Well Production	002	Cooling Unit	Other	15	965	0	0	36	1016	gas	Gas
GHD0036	Anadarko	Well Production	002	Separator	Separator	32	0	0	2	8	42	gas	Gas
GHD0036	Anadarko	Well Production	002	Separator	Separator	78	84	0	2	0	164	oil	Gas
GHD0036	Anadarko	Well Production	002	Separator	Separator	6	36	1	0	2	45	gas	Gas
GHD0036	Anadarko	Well Production	002	Separator	Separator	2	31	1	0	0	34	oil	Gas
GHD0036	Anadarko	Well Production	002	Dehydrator/Separator	Separator	37	200	5	2	6	250	gas	Gas
GHD0036	Anadarko	Well Production	002	Dehydrator/Separator	Separator	16	208	2	1	4	231	gas	Gas
GHD0036	Anadarko	Well Production	002	Storage Vessel	Other	4	50	0	2	0	56	oil	Gas
GHD0036	Anadarko	Well Production	002	Compressor	Compressor	43	1012	9	5	13	1082	gas	Gas
GHD0036	Anadarko	Well Production	002	Compressor	Compressor	43	1012	9	5	13	1082	gas	Gas
GHD0036	Anadarko	Well Production	002	Meters/Piping	Meters/Piping	52	82	3	1	42	180	gas	Gas
GHD0037	Anadarko	Well Site	002	Wellhead	Wellhead	22	64	3	0	7	96	gas	Oil
GHD0037	Anadarko	Well Site	002	Heater Treater	Heater Treater	21	197	6	2	5	231	gas	Oil
GHD0037	Anadarko	Well Site	002	Heater Treater	Heater Treater	17	114	0	0	1	132	oil	Oil
GHD0037	Anadarko	Well Site	002	Separator	Separator	20	155	2	1	0	178	gas	Oil
GHD0037	Anadarko	Well Site	002	Separator	Separator	14	106	1	0	0	121	oil	Oil
GHD0037	Anadarko	Well Site	002	Separator	Separator	12	123	1	1	2	139	gas	Oil
GHD0037	Anadarko	Well Site	002	Separator	Separator	3	34	0	0	0	37	oil	Oil
GHD0037	Anadarko	Well Site	002	Meters/Piping	Meters/Piping	28	55	2	1	16	102	gas	Oil
GHD0037	Anadarko	Well Site	002	Storage Vessel	Other	10	310	0	2	6	328	oil	Oil
GHD0038	Anadarko	Well Site	002	Wellhead	Wellhead	13	53	1	0	15	82	gas	Gas
GHD0038	Anadarko	Well Site	002	Separator	Separator	18	42	0	2	0	62	gas	Gas
GHD0038	Anadarko	Well Site	002	Separator	Separator	4	0	0	0	0	4	oil	Gas
GHD0038	Anadarko	Well Site	002	Separator	Separator	18	40	1	1	4	64	gas	Gas
GHD0038	Anadarko	Well Site	002	Separator	Separator	5	61	0	0	1	67	oil	Gas
GHD0038	Anadarko	Well Site	002	Separator	Separator	7	33	0	1	2	43	gas	Gas
GHD0038	Anadarko	Well Site	002	Separator	Separator	4	0	1	0	0	5	oil	Gas
GHD0038	Anadarko	Well Site	002	Meters/Piping	Meters/Piping	28	50	0	1	21	100	gas	Gas
GHD0038	Anadarko	Well Site	002	Storage Vessel	Other	7	96	0	0	8	111	oil	Gas
GHD0039	Anadarko	Boosting and Gathering	001	Compressor	Compressor	12	22	0	0	6	40	gas	Gas
GHD0039	Anadarko	Boosting and Gathering	001	Compressor	Compressor	44	885	5	1	16	951	gas	Gas
GHD0039	Anadarko	Boosting and Gathering	001	Separator	Separator	3	13	0	1	3	20	gas	Gas
GHD0039	Anadarko	Boosting and Gathering	001	Separator	Separator	4	29	0	0	0	33	oil	Gas
GHD0039	Anadarko	Boosting and Gathering	001	Meters/Piping	Meters/Piping	12	13	0	0	10	35	gas	Gas
GHD0039	Anadarko	Boosting and Gathering	001	Meters/Piping	Meters/Piping	12	23	0	0	9	44	gas	Gas
GHD0039	Anadarko	Boosting and Gathering	001	Meters/Piping	Meters/Piping	6	4	0	0	0	10	gas	Gas
GHD0040	Anadarko	Well Production	001	Wellhead	Wellhead	5	34	0	0	0	39	gas	Gas
GHD0040	Anadarko	Well Production	001	Pig Station	Meters/Piping	23	48	0	0	7	78	gas	Gas
GHD0041	Anadarko	Well Production	001	Wellhead	Wellhead	6	26	0	0	0	32	gas	Gas
GHD0041	Anadarko	Well Production	001	Meters/Piping	Meters/Piping	18	37	0	0	5	60	gas	Gas
GHD0042	Anadarko	Well Production	001	Wellhead	Wellhead	6	23	0	0	0	29	gas	Gas
GHD0042	Anadarko	Well Production	001	Meters/Piping	Meters/Piping	14	21	1	0	4	40	gas	Gas
GHD0043	Anadarko	Boosting and Gathering	001	Contactor	Dehydrator	8	2	0	0	0	10	oil	Gas
GHD0043	Anadarko	Boosting and Gathering	001	Pig Station	Meters/Piping	57	130	8	3	7	205	gas	Gas
GHD0043	Anadarko	Boosting and Gathering	001	Compressor	Compressor	53	757	15	1	104	930	gas	Gas
GHD0043	Anadarko	Boosting and Gathering	001	Dehydrator	Dehydrator	8	114	1	0	0	123	gas	Gas
GHD0043	Anadarko	Boosting and Gathering	001	Separator	Separator	11	22	0	1	0	34	gas	Gas
GHD0043	Anadarko	Boosting and Gathering	001	Separator	Separator	0	18	2	0	0	20	oil	Gas
GHD0043	Anadarko	Boosting and Gathering	001	Separator	Separator	30	17	1	1	8	57	gas	Gas
GHD0043	Anadarko	Boosting and Gathering	001	Separator	Separator	5	0	0	0	0	5	oil	Gas
GHD0043	Anadarko	Boosting and Gathering	001	Separator	Separator	17	38	0	1	3	59	gas	Gas
GHD0043	Anadarko	Boosting and Gathering	001	Separator	Separator	7	4	1	0	0	12	oil	Gas
GHD0043	Anadarko	Boosting and Gathering	001	Meters/Piping	Meters/Piping	34	180	6	4	5	229	gas	Gas
GHD0043	Anadarko	Boosting and Gathering	001	Storage Vessel	Other	21	114	4	3	2	144	oil	Gas
GHD0043	Anadarko	Boosting and Gathering	001	Compressor	Compressor	53	757	15	1	104	930	gas	Gas
GHD0043	Anadarko	Boosting and Gathering	001	Compressor	Compressor	53	757	15	1	104	930	gas	Gas
GHD0044	Anadarko	Boosting and Gathering	001	Meters/Piping	Meters/Piping	13	12	0	0	8	33	gas	Gas
GHD0044	Anadarko	Boosting and Gathering	001	Compressor	Compressor	34	712	0	2	12	760	gas	Gas
GHD0044	Anadarko	Boosting and Gathering	001	Meters/Piping	Meters/Piping	13	41	0	1	5	60	gas	Gas
GHD0045	Anadarko	Well Production	001	Wellhead	Wellhead	4	16	0	0	1	21	gas	Gas
GHD0046	Anadarko	Well Production	001	Wellhead	Wellhead	5	23	0	0	0	28	gas	Gas
GHD0046	Anadarko	Well Production	001	Meters/Piping	Meters/Piping	19	29	1	0	6	55	gas	Gas
GHD0047	Anadarko	Well Production	001	Wellhead	Wellhead	3	15	0	0	1	19	gas	Gas
GHD0048	Gulf Coast	Well Production	006	Wellhead	Wellhead	17	60	2	2	16	97	gas	Gas
GHD0048	Gulf Coast	Well Production	006	Separator	Separator	7	70	0	1	8	86	gas	Gas
GHD0048	Gulf Coast	Well Production	006	Separator	Separator	3	70	0	0	0	73	oil	Gas
GHD0048	Gulf Coast	Well Production	006	Separator	Separator	12	184	0	1	0	197	gas	Gas
GHD0048	Gulf Coast	Well Production	006	Separator	Separator	2	42	0	0	0	44	oil	Gas
GHD0048	Gulf Coast	Well Production	006	Separator	Separator	10	109	0	2	10	131	gas	Gas
GHD0048	Gulf Coast	Well Production	006	Separator	Separator	12	338	0	0	0	350	oil	Gas
GHD0048	Gulf Coast	Well Production	006	Separator	Separator	14	88	0	1	6	109	gas	Gas
GHD0048	Gulf Coast	Well Production	006	Separator	Separator	18	110	2	0	0	130	oil	Gas
GHD0048	Gulf Coast	Well Production	006	Meters/Piping	Meters/Piping	32	60	2	1	24	119	gas	Gas
GHD0048	Gulf Coast	Well Production	006	Meters/Piping	Meters/Piping	32	60	2	1	24	119	gas	Gas
GHD0048	Gulf Coast	Well Production	006	Meters/Piping	Meters/Piping	33	0	2	1	24	60	gas	Gas
GHD0048	Gulf Coast	Well Production	006	Meters/Piping	Meters/Piping	33	0	2	1	24	60	gas	Gas
GHD0048	Gulf Coast	Well Production	006	Meters/Piping	Meters/Piping	33	0	2	1	24	60	gas	Gas
GHD0048	Gulf Coast	Well Production	006	Meters/Piping	Meters/Piping	33	0	2	1	24	60	gas	Gas
GHD0048	Gulf Coast	Well Production	006	Wellhead	Wellhead	16	59	2	2	16	95	gas	Gas
GHD0048	Gulf Coast	Well Production	006	Meters/Piping	Meters/Piping	33	0	2	1	24	60	gas	Gas
GHD0048	Gulf Coast	Well Production	006	Meters/Piping	Meters/Piping	33	0	2	1	24	60	gas	Gas
GHD0048	Gulf Coast	Well Production	006	Meters/Piping	Meters/Piping	33	0	2	1	24	60	gas	Gas
GHD0048	Gulf Coast	Well Production	006	Meters/Piping	Meters/Piping	33	0	2	1	24	60	gas	Gas
GHD0048	Gulf Coast	Well Production	006	Meters/Piping	Meters/Piping	32	0	2	1	24	59	gas	Gas
GHD0048	Gulf Coast	Well Production	006	Meters/Piping	Meters/Piping	32	0	2	1	24	59	gas	Gas
GHD0048	Gulf Coast	Well Production	006	Meters/Piping	Meters/Piping	6	0	0	1	15	22	gas	Gas
GHD0048	Gulf Coast	Well Production	006	Meters/Piping	Meters/Piping	6	0	0	1	14	21	gas	Gas
GHD0048	Gulf Coast	Well Production	006	Meters/Piping	Meters/Piping	26	63	0	1	23	113	gas	Gas
GHD0048	Gulf Coast	Well Production	006	Pig Station	Meters/Piping	46	75	0	0	43	164	gas	Gas
GHD0048	Gulf Coast	Well Production	006	Wellhead	Wellhead	16	59	2	2	16	95	gas	Gas
GHD0048	Gulf Coast	Well Production	006	Meters/Piping	Meters/Piping	30	59	0	1	26	116	gas	Gas
GHD0048	Gulf Coast	Well Production	006	Meters/Piping	Meters/Piping	29	59	0	1	26	115	gas	Gas
GHD0048	Gulf Coast	Well Production	006	Meters/Piping	Meters/Piping	28	75	0	1	23	127	gas	Gas
GHD0048	Gulf Coast	Well Production	006	Meters/Piping	Meters/Piping	28	75	1	1	23	128	gas	Gas
GHD0048	Gulf Coast	Well Production	006	Meters/Piping	Meters/Piping	23	62	1	0	23	109	gas	Gas
GHD0048	Gulf Coast	Well Production	006	Wellhead	Wellhead	16	59	1	1	16	93	gas	Gas
GHD0048	Gulf Coast	Well Production	006	Wellhead	Wellhead	16	59	1	1	16	93	gas	Gas
GHD0048	Gulf Coast	Well Production	006	Wellhead	Wellhead	16	59	1	1	16	93	gas	Gas
GHD0048	Gulf Coast	Well Production	006	Wellhead	Wellhead	15	59	1	1	16	92	gas	Gas
GHD0048	Gulf Coast	Well Production	006	Wellhead	Wellhead	14	59	1	1	15	90	gas	Gas
GHD0048	Gulf Coast	Well Production	006	Dehydrator	Dehydrator	64	849	0	2	16	931	gas	Gas
GHD0048	Gulf Coast	Well Production	006	Dehydrator	Dehydrator	3	42	0	0	0	45	oil	Gas
GHD0049	Gulf Coast	Well Production	006	Wellhead	Wellhead	7	21	0	0	7	35	gas	Gas
GHD0049	Gulf Coast	Well Production	006	Meters/Piping	Meters/Piping	17	71	2	0	4	94	gas	Gas
GHD0049	Gulf Coast	Well Production	006	Meters/Piping	Meters/Piping	1	0	0	0	0	1	oil	Gas
GHD0049	Gulf Coast	Well Production	006	Meters/Piping	Meters/Piping	9	41	0	0	12	62	gas	Gas
GHD0049	Gulf Coast	Well Production	006	Meters/Piping	Meters/Piping	8	41	0	0	11	60	gas	Gas
GHD0049	Gulf Coast	Well Production	006	Meters/Piping	Meters/Piping	8	40	0	0	11	59	gas	Gas
GHD0049	Gulf Coast	Well Production	006	Meters/Piping	Meters/Piping	8	40	0	0	11	59	gas	Gas
GHD0049	Gulf Coast	Well Production	006	Meters/Piping	Meters/Piping	8	40	0	0	11	59	gas	Gas
GHD0049	Gulf Coast	Well Production	006	Meters/Piping	Meters/Piping	8	40	0	0	11	59	gas	Gas
GHD0049	Gulf Coast	Well Production	006	Meters/Piping	Meters/Piping	7	40	0	0	11	58	gas	Gas
GHD0049	Gulf Coast	Well Production	006	Meters/Piping	Meters/Piping	6	40	0	0	11	57	gas	Gas
GHD0049	Gulf Coast	Well Production	006	Compressor	Compressor	21	585	0	3	79	688	gas	Gas
GHD0049	Gulf Coast	Well Production	006	Dehydrator	Dehydrator	29	403	0	3	12	447	gas	Gas
GHD0049	Gulf Coast	Well Production	006	Dehydrator	Dehydrator	3	0	0	0	0	3	oil	Gas
GHD0049	Gulf Coast	Well Production	006	Separator	Separator	14	28	0	0	5	47	gas	Gas
GHD0049	Gulf Coast	Well Production	006	Separator	Separator	0	107	0	0	10	117	oil	Gas
GHD0049	Gulf Coast	Well Production	006	Separator	Separator	15	133	3	0	10	161	gas	Gas
GHD0049	Gulf Coast	Well Production	006	Separator	Separator	21	57	7	0	32	117	oil	Gas
GHD0049	Gulf Coast	Well Production	006	Separator	Separator	2	28	0	1	5	36	gas	Gas
GHD0049	Gulf Coast	Well Production	006	Separator	Separator	7	0	0	0	1	8	oil	Gas
GHD0049	Gulf Coast	Well Production	006	Meters/Piping	Meters/Piping	10	31	0	0	5	46	gas	Gas
GHD0049	Gulf Coast	Well Production	006	Meters/Piping	Meters/Piping	1	2	0	0	0	3	oil	Gas
GHD0049	Gulf Coast	Well Production	006	Meters/Piping	Meters/Piping	20	101	0	0	33	154	gas	Gas
GHD0049	Gulf Coast	Well Production	006	Header	Header	10	8	0	0	18	36	oil	Gas
GHD0050	Gulf Coast	Well Production	006	Wellhead	Wellhead	21	112	0	2	17	152	gas	Gas
GHD0050	Gulf Coast	Well Production	006	Storage Vessel	Other	5	26	0	0	15	46	oil	Gas
GHD0050	Gulf Coast	Well Production	006	Storage Vessel	Other	4	26	0	0	13	43	oil	Gas
GHD0050	Gulf Coast	Well Production	006	Storage Vessel	Other	3	22	0	0	13	38	oil	Gas
GHD0050	Gulf Coast	Well Production	006	Meters/Piping	Meters/Piping	22	57	0	1	11	91	gas	Gas
GHD0050	Gulf Coast	Well Production	006	Meters/Piping	Meters/Piping	1	2	0	0	0	3	oil	Gas
GHD0050	Gulf Coast	Well Production	006	Meters/Piping	Meters/Piping	21	56	0	1	11	89	gas	Gas
GHD0050	Gulf Coast	Well Production	006	Meters/Piping	Meters/Piping	0	2	0	0	0	2	oil	Gas
GHD0050	Gulf Coast	Well Production	006	Compressor	Compressor	23	289	0	5	50	367	gas	Gas
GHD0050	Gulf Coast	Well Production	006	Separator	Separator	14	131	1	1	6	153	gas	Gas
GHD0050	Gulf Coast	Well Production	006	Separator	Separator	17	188	0	0	0	205	oil	Gas
GHD0050	Gulf Coast	Well Production	006	Separator	Separator	29	100	0	0	30	159	gas	Gas
GHD0050	Gulf Coast	Well Production	006	Separator	Separator	10	136	0	0	0	146	oil	Gas
GHD0050	Gulf Coast	Well Production	006	Separator	Separator	5	5	0	0	5	15	gas	Gas
GHD0050	Gulf Coast	Well Production	006	Separator	Separator	6	50	0	0	0	56	oil	Gas
GHD0050	Gulf Coast	Well Production	006	Header	Header	20	99	0	0	87	206	gas	Gas
GHD0050	Gulf Coast	Well Production	006	Dehydrator	Dehydrator	5	37	0	1	3	46	gas	Gas
GHD0050	Gulf Coast	Well Production	006	Dehydrator	Dehydrator	4	24	0	0	0	28	oil	Gas
GHD0050	Gulf Coast	Well Production	006	Storage Vessel	Other	5	5	0	0	8	18	oil	Gas
GHD0050	Gulf Coast	Well Production	006	Meters/Piping	Meters/Piping	12	43	0	0	14	69	gas	Gas
GHD0051	Gulf Coast	Well Site	006	Wellhead	Wellhead	16	26	1	0	17	60	gas	Gas
GHD0051	Gulf Coast	Well Site	006	Separator	Separator	8	64	0	0	6	78	gas	Gas
GHD0051	Gulf Coast	Well Site	006	Separator	Separator	10	44	0	0	0	54	oil	Gas
GHD0051	Gulf Coast	Well Site	006	Meters/Piping	Meters/Piping	11	51	0	0	8	70	gas	Gas
GHD0051	Gulf Coast	Well Site	006	Storage Vessel	Other	4	56	0	0	0	60	oil	Gas
GHD0051	Gulf Coast	Well Site	006	Storage Vessel	Other	3	56	0	0	0	59	oil	Gas
GHD0052	Gulf Coast	Central Production	006	Meters/Piping	Meters/Piping	5	25	0	0	0	30	gas	Gas
GHD0052	Gulf Coast	Central Production	006	Separator	Separator	11	114	1	2	0	128	gas	Gas
GHD0052	Gulf Coast	Central Production	006	Separator	Separator	9	83	0	0	0	92	oil	Gas
GHD0052	Gulf Coast	Central Production	006	Meters/Piping	Meters/Piping	5	25	0	0	0	30	gas	Gas
GHD0052	Gulf Coast	Central Production	006	Separator	Separator	15	141	1	2	0	159	gas	Gas
GHD0052	Gulf Coast	Central Production	006	Separator	Separator	10	82	0	0	0	92	oil	Gas
GHD0052	Gulf Coast	Central Production	006	Meters/Piping	Meters/Piping	5	13	0	0	0	18	gas	Gas
GHD0052	Gulf Coast	Central Production	006	Separator	Separator	7	101	1	0	1	110	gas	Gas
GHD0052	Gulf Coast	Central Production	006	Separator	Separator	7	101	0	0	2	110	oil	Gas
GHD0052	Gulf Coast	Central Production	006	Meters/Piping	Meters/Piping	5	25	0	0	0	30	gas	Gas
GHD0052	Gulf Coast	Central Production	006	Separator	Separator	23	175	1	2	1	202	gas	Gas
GHD0052	Gulf Coast	Central Production	006	Separator	Separator	13	93	0	0	0	106	oil	Gas
GHD0052	Gulf Coast	Central Production	006	Meters/Piping	Meters/Piping	24	288	1	0	12	325	gas	Gas
GHD0052	Gulf Coast	Central Production	006	Storage Vessel	Other	18	269	0	6	0	293	oil	Gas
GHD0053	Gulf Coast	Central Production	006	Wellhead	Wellhead	14	45	1	0	14	74	gas	Gas
GHD0054	Gulf Coast	Central Production	006	Wellhead	Wellhead	12	40	2	0	12	66	gas	Gas
GHD0055	Permian	Well Site	007	Wellhead	Wellhead	5	158	3	0	3	169	gas	Oil
GHD0055	Permian	Well Site	007	Separator	Separator	6	205	0	1	0	212	gas	Oil
GHD0055	Permian	Well Site	007	Separator	Separator	4	96	0	0	0	100	oil	Oil
GHD0055	Permian	Well Site	007	Meters/Piping	Meters/Piping	12	59	2	0	5	78	gas	Oil
GHD0055	Permian	Well Site	007	Storage Vessel	Other	5	45	0	1	0	51	oil	Oil
GHD0056	Permian	Well Production	007	Separator	Separator	23	46	1	1	82	153	gas	Oil
GHD0056	Permian	Well Production	007	Separator	Separator	10	16	0	0	42	68	oil	Oil
GHD0056	Permian	Well Production	007	Compressor	Compressor	11	184	0	2	5	202	gas	Oil
GHD0056	Permian	Well Production	007	Compressor	Compressor	11	173	0	2	4	190	gas	Oil
GHD0056	Permian	Well Production	007	Storage Vessel	Other	90	48	0	0	282	420	oil	Oil
GHD0056	Permian	Well Production	007	Flare	Other	1	16	8	0	1	26	gas	Oil
GHD0056	Permian	Well Production	007	Header	Header	18	54	0	0	24	96	gas	Oil
GHD0056	Permian	Well Production	007	Header	Header	2	4	0	0	0	6	oil	Oil
GHD0056	Permian	Well Production	007	Meters/Piping	Meters/Piping	18	0	0	0	107	125	gas	Oil
GHD0056	Permian	Well Production	007	Meters/Piping	Meters/Piping	26	0	0	0	75	101	oil	Oil
GHD0056	Permian	Well Production	007	Meters/Piping	Meters/Piping	12	43	0	1	7	63	gas	Oil
GHD0056	Permian	Well Production	007	Heater Treater	Heater Treater	28	279	1	1	69	378	gas	Oil
GHD0056	Permian	Well Production	007	Heater Treater	Heater Treater	23	32	0	0	27	82	oil	Oil
GHD0056	Permian	Well Production	007	Heater Treater	Heater Treater	28	279	1	1	69	378	gas	Oil
GHD0056	Permian	Well Production	007	Heater Treater	Heater Treater	23	32	0	0	27	82	oil	Oil
GHD0056	Permian	Well Production	007	Separator	Separator	31	212	1	1	72	317	gas	Oil
GHD0056	Permian	Well Production	007	Separator	Separator	2	0	0	0	20	22	oil	Oil
GHD0056	Permian	Well Production	007	Separator	Separator	9	38	0	1	18	66	gas	Oil
GHD0056	Permian	Well Production	007	Separator	Separator	4	0	0	0	8	12	oil	Oil
GHD0056	Permian	Well Production	007	Separator	Separator	31	212	1	1	72	317	gas	Oil
GHD0056	Permian	Well Production	007	Separator	Separator	2	0	0	0	20	22	oil	Oil
GHD0056	Permian	Well Production	007	Separator	Separator	23	46	1	1	82	153	gas	Oil
GHD0056	Permian	Well Production	007	Separator	Separator	10	16	0	0	42	68	oil	Oil
GHD0056	Permian	Well Production	007	Separator	Separator	23	46	1	1	82	153	gas	Oil
GHD0056	Permian	Well Production	007	Separator	Separator	10	16	0	0	42	68	oil	Oil
GHD0056	Permian	Well Production	007	Meters/Piping	Meters/Piping	12	43	0	1	7	63	gas	Oil
GHD0056	Permian	Well Production	007	Meters/Piping	Meters/Piping	12	43	0	1	7	63	gas	Oil
GHD0056	Permian	Well Production	007	Separator	Separator	7	32	0	0	12	51	gas	Oil
GHD0056	Permian	Well Production	007	Separator	Separator	6	52	0	1	20	79	gas	Oil
GHD0056	Permian	Well Production	007	Separator	Separator	2	0	2	0	21	25	oil	Oil
GHD0056	Permian	Well Production	007	Separator	Separator	11	13	0	1	11	36	gas	Oil
GHD0056	Permian	Well Production	007	Separator	Separator	8	30	0	0	27	65	oil	Oil
GHD0056	Permian	Well Production	007	Heater Treater	Heater Treater	28	279	1	1	69	378	gas	Oil
GHD0056	Permian	Well Production	007	Heater Treater	Heater Treater	23	32	0	0	27	82	oil	Oil
GHD0056	Permian	Well Production	007	Separator	Separator	31	212	1	1	72	317	gas	Oil
GHD0056	Permian	Well Production	007	Separator	Separator	2	0	0	0	20	22	oil	Oil
GHD0056	Permian	Well Production	007	Separator	Separator	14	99	0	1	23	137	gas	Oil
GHD0056	Permian	Well Production	007	Separator	Separator	6	0	0	0	12	18	oil	Oil
GHD0056	Permian	Well Production	007	Compressor	Compressor	23	132	0	4	64	223	gas	Oil
GHD0057	Permian	Well Production	007	Wellhead	Wellhead	11	150	5	0	1	167	gas	Oil
GHD0057	Permian	Well Production	007	Separator	Separator	11	128	1	2	0	142	gas	Oil
GHD0057	Permian	Well Production	007	Separator	Separator	1	57	0	0	0	58	oil	Oil
GHD0057	Permian	Well Production	007	Storage Vessel	Other	3	146	0	0	0	149	oil	Oil
GHD0058	Permian	Well Site	007	Wellhead	Wellhead	4	74	1	0	0	79	gas	Oil
GHD0058	Permian	Well Site	007	Separator	Separator	12	104	0	1	12	129	gas	Oil
GHD0058	Permian	Well Site	007	Separator	Separator	4	94	2	0	0	100	oil	Oil
GHD0058	Permian	Well Site	007	Storage Vessel	Other	2	60	0	1	0	63	oil	Oil
GHD0058	Permian	Well Site	007	Storage Vessel	Other	6	108	0	1	30	145	oil	Oil
GHD0058	Permian	Well Site	007	Meters/Piping	Meters/Piping	7	30	1	0	5	43	gas	Oil
GHD0059	Permian	Well Production	007	Separator	Separator	15	44	11	1	26	97	gas	Oil
GHD0059	Permian	Well Production	007	Separator	Separator	4	32	0	0	0	36	oil	Oil
GHD0059	Permian	Well Production	007	Storage Vessel	Other	81	32	1	0	371	485	oil	Oil
GHD0059	Permian	Well Production	007	Header	Header	17	3	0	0	24	44	gas	Oil
GHD0059	Permian	Well Production	007	Meters/Piping	Meters/Piping	69	84	0	0	119	272	oil	Oil
GHD0059	Permian	Well Production	007	VRU	Compressor	40	330	0	4	24	398	gas	Oil
GHD0059	Permian	Well Production	007	Meters/Piping	Meters/Piping	18	17	0	0	27	62	gas	Oil
GHD0059	Permian	Well Production	007	Separator	Separator	15	47	0	1	68	131	gas	Oil
GHD0059	Permian	Well Production	007	Separator	Separator	22	51	6	0	51	130	oil	Oil
GHD0059	Permian	Well Production	007	Heater Treater	Heater Treater	14	158	1	1	15	189	gas	Oil
GHD0059	Permian	Well Production	007	Heater Treater	Heater Treater	22	56	6	0	77	161	oil	Oil
GHD0059	Permian	Well Production	007	Separator	Separator	15	176	0	2	28	221	gas	Oil
GHD0059	Permian	Well Production	007	Separator	Separator	36	172	2	0	78	288	oil	Oil
GHD0059	Permian	Well Production	007	Separator	Separator	15	176	0	2	28	221	gas	Oil
GHD0059	Permian	Well Production	007	Separator	Separator	36	172	2	0	78	288	oil	Oil
GHD0059	Permian	Well Production	007	Separator	Separator	15	176	0	2	28	221	gas	Oil
GHD0059	Permian	Well Production	007	Separator	Separator	36	172	2	0	78	288	oil	Oil
GHD0059	Permian	Well Production	007	Separator	Separator	5	21	0	1	9	36	gas	Oil
GHD0059	Permian	Well Production	007	Separator	Separator	7	40	0	0	0	47	oil	Oil
GHD0059	Permian	Well Production	007	Separator	Separator	5	6	0	1	12	24	gas	Oil
GHD0059	Permian	Well Production	007	Separator	Separator	11	28	0	0	0	39	oil	Oil
GHD0059	Permian	Well Production	007	Separator	Separator	15	47	0	1	68	131	gas	Oil
GHD0059	Permian	Well Production	007	Separator	Separator	22	51	6	0	51	130	oil	Oil
GHD0059	Permian	Well Production	007	Heater Treater	Heater Treater	14	158	1	1	15	189	gas	Oil
GHD0059	Permian	Well Production	007	Heater Treater	Heater Treater	22	56	6	0	77	161	oil	Oil
GHD0059	Permian	Well Production	007	Separator	Separator	15	176	0	2	28	221	gas	Oil
GHD0059	Permian	Well Production	007	Separator	Separator	36	172	2	0	78	288	oil	Oil
GHD0059	Permian	Well Production	007	Compressor	Compressor	28	152	0	6	90	276	gas	Oil
GHD0059	Permian	Well Production	007	Storage Vessel	Other	55	39	11	0	93	198	oil	Oil
GHD0060	Permian	Well Site	007	Wellhead	Wellhead	7	126	2	0	0	135	gas	Oil
GHD0060	Permian	Well Site	007	Separator	Separator	5	240	0	0	5	250	gas	Oil
GHD0060	Permian	Well Site	007	Separator	Separator	6	76	0	0	0	82	oil	Oil
GHD0060	Permian	Well Site	007	Storage Vessel	Other	2	36	1	0	10	49	oil	Oil
GHD0060	Permian	Well Site	007	Storage Vessel	Other	9	124	0	0	0	133	oil	Oil
GHD0061	Permian	Well Site	007	Separator	Separator	6	196	0	1	39	242	gas	Oil
GHD0061	Permian	Well Site	007	Separator	Separator	4	116	2	0	18	140	oil	Oil
GHD0061	Permian	Well Site	007	Separator	Separator	5	89	0	0	18	112	gas	Oil
GHD0061	Permian	Well Site	007	Separator	Separator	10	154	2	0	19	185	oil	Oil
GHD0061	Permian	Well Site	007	Heater Treater	Heater Treater	11	154	2	1	0	168	gas	Oil
GHD0061	Permian	Well Site	007	Heater Treater	Heater Treater	4	68	2	0	0	74	oil	Oil
GHD0061	Permian	Well Site	007	Wellhead	Wellhead	28	350	0	0	0	378	gas	Oil
GHD0061	Permian	Well Site	007	VRU	Compressor	5	22	0	1	2	30	gas	Oil
GHD0061	Permian	Well Site	007	VRU	Compressor	3	26	0	0	0	29	oil	Oil
GHD0061	Permian	Well Site	007	Storage Vessel	Other	4	94	2	0	43	143	oil	Oil
GHD0061	Permian	Well Site	007	Storage Vessel	Other	15	262	0	0	5	282	oil	Oil
GHD0061	Permian	Well Site	007	Meters/Piping	Meters/Piping	21	98	2	0	9	130	gas	Oil
GHD0061	Permian	Well Site	007	Meters/Piping	Meters/Piping	10	77	0	0	1	88	gas	Oil
GHD0067	Permian	Central Production	003	Separator	Separator	23	9	0	1	76	109	gas	Oil
GHD0067	Permian	Central Production	003	Separator	Separator	7	0	0	0	20	27	oil	Oil
GHD0067	Permian	Central Production	003	Meters/Piping	Meters/Piping	7	56	2	0	29	94	oil	Oil
GHD0067	Permian	Central Production	003	Meters/Piping	Meters/Piping	10	19	0	0	5	34	gas	Oil
GHD0067	Permian	Central Production	003	Storage Vessel	Other	16	0	0	0	58	74	oil	Oil
GHD0068	Permian	Well Site	003	Wellhead	Wellhead	29	238	0	0	4	271	gas	Oil
GHD0069	Permian	Central Production	003	Flare	Other	17	221	0	0	12	250	gas	Oil
GHD0069	Permian	Central Production	003	Header	Header	47	96	0	0	55	198	gas	Oil
GHD0069	Permian	Central Production	003	Wellhead	Wellhead	1	65	0	1	0	67	gas	Oil
GHD0069	Permian	Central Production	003	Wellhead	Wellhead	23	216	2	0	7	248	oil	Oil
GHD0069	Permian	Central Production	003	Separator	Separator	19	309	0	1	15	344	gas	Oil
GHD0069	Permian	Central Production	003	Separator	Separator	22	196	2	0	7	227	oil	Oil
GHD0069	Permian	Central Production	003	Meters/Piping	Meters/Piping	10	254	1	0	0	265	oil	Oil
GHD0069	Permian	Central Production	003	VRU Compressor	Compressor	12	148	0	1	0	161	gas	Oil
GHD0069	Permian	Central Production	003	Storage Tank	Other	16	194	0	0	28	238	oil	Oil
GHD0069	Permian	Central Production	003	Storage Vessel	Other	5	60	0	0	7	72	oil	Oil
GHD0070	Permian	Well Site	003	Meters/Piping	Meters/Piping	14	70	1	0	7	92	gas	Oil
GHD0070	Permian	Well Site	003	Header	Header	32	112	0	0	77	221	gas	Oil
GHD0070	Permian	Well Site	003	Storage Vessel	Other	16	88	1	0	20	125	oil	Oil
GHD0070	Permian	Well Site	003	Storage Vessel	Other	7	74	0	0	12	93	oil	Oil
GHD0070	Permian	Well Site	003	Flare	Other	1	54	0	0	29	84	gas	Oil
GHD0070	Permian	Well Site	003	Separator	Separator	5	68	1	1	12	87	gas	Oil
GHD0070	Permian	Well Site	003	Separator	Separator	28	104	2	0	47	181	oil	Oil
GHD0070	Permian	Well Site	003	Separator	Separator	14	116	2	1	37	170	gas	Oil
GHD0070	Permian	Well Site	003	Separator	Separator	1	46	1	0	34	82	oil	Oil
GHD0071	Permian	Well Site	003	Wellhead	Wellhead	23	192	0	0	6	221	gas	Oil
GHD0072	Permian	Well Site	003	Wellhead	Wellhead	23	229	1	0	5	258	gas	Oil

## Sheet: Leakers
Site ID	CompanyID	BasinID	Site Category	Oil or Gas Site	Major Equipment ID	Subpart W Major Equipment Classification	Component Type	Component Service	Detected with FID/Method 21	Detected with OGI	Measured Emission Rate (scfm)	FID Screening Value (ppm)	Instrument Response Factor Used in Corrections	Measured Emission Rate (scfh) used in Main Study Analyses	Site Component Count Available	Leak Detected Using Method	High-volume Sampler Used in Measurement	QA Instrument in Instrument Exhaust	Instrument Used for Final Concentration Input into Emission Calculation	Transitional Failure	CH4%	C2H6%	C3H8%	C4H10%	HF Concentration Reading (%Gas)	QA Instrument Concentration Reading (%Gas)	Final Concentration Reading (%Gas)	Uncorrected Whole Gas Emission Rate (scfh)
GHD0039	001	Anadarko	Boosting and Gathering	Gas	Compressor	Compressor	OELs	gas	n	y	1.39425		0.915872	83.6549	yes	OGI Only	Bacharach	DPIR	Bacharach		72.9	6.598	3.978	0.549	19.16	100	19.16	76.6172
GHD0043	001	Anadarko	Boosting and Gathering	Gas	Compressor	Compressor	Flange	gas	y	y	1.26456	50000	0.924407	75.8737	yes	OGI and FID	Bacharach	n/a	Bacharach		73.229	6.683	4.318	0.578	15.99		15.99	70.1382
GHD0036	002	Anadarko	Well Production	Gas	Separator	Separator	Connectors	gas	y	y	1.23722	50000	1.04705	74.2334	yes	OGI and FID	Bacharach	DPIR	Bacharach		95.37	0.62	0.06	0.01	18.3	17.09	18.3	77.7264
GHD0048	006	Gulf Coast	Well Production	Gas	Meters/Piping	Meters/Piping	Valves	gas	y	y	1.08283	50000	1.06757	64.9696	yes	OGI and FID	Bacharach	Gas Rover	Bacharach		93.434	3.396	0.906	0.206	15.3	14	15.3	69.3594
GHD0011	005	San Juan	Well Site	Oil	Compressor	Compressor	Connectors	gas	n/a	y	0.795514		0.959534	47.7308	yes	OGI Only - No FID Survey	Indaco HF	n/a	Indaco HF		78.6	5.7	3.4	0.7135	12		12	45.7993
GHD0043	001	Anadarko	Boosting and Gathering	Gas	Compressor	Compressor	Flange	gas	y	y	0.750066	50000	0.924407	45.0039	yes	OGI and FID	Bacharach	n/a	Bacharach		73.229	6.683	4.318	0.578	11.53		11.53	41.602
GHD0004	008	San Juan	Central Production	Oil	Compressor	Compressor	Connectors	gas	n	y	0.746806		0.88181	44.8084	yes	OGI Only	Bacharach	n/a	Bacharach		61.351	10.066	7.243	2.24	7.01		7.01	39.5125
GHD0016	007	Gulf Coast	Well Site	Gas	Compressor	Compressor	OELs	gas	y	y	0.735576	1536	1.00012	44.1345	yes	OGI and FID	Bacharach	DPIR	Bacharach		87.418	3.131	0.937	0.268	9	50	9	44.1398
GHD0019	005	Gulf Coast	Well Site	Oil	Pig Station	Meters/Piping	Valves	gas	y	y	0.72874	1291	4.48	43.7244	yes	OGI and FID	Bacharach	DPIR	DPIR	X	87.4	6.5	2.2	0.385	2.57	45	45	195.885
GHD0031	004	Anadarko	Well Production	Gas	Compressor	Compressor	Vent	gas	y	y	0.699771	50000	0.954496	41.9863	yes	OGI and FID	Indaco HF	n/a	Indaco HF		74.518	8.438	6.551	0.772	12		12	40.0758
GHD0044	001	Anadarko	Boosting and Gathering	Gas	Compressor	Compressor	Valves	gas	y	y	0.554546	50000	0.91463	33.2727	yes	OGI and FID	Bacharach	n/a	Bacharach		72.881	6.595	3.928	0.507	5.6		5.6	30.4322
GHD0021	005	Gulf Coast	Boosting and Gathering	Oil	Flare	Other	Instrument	gas	y	y	0.542564	50000	1.05169	32.5538	yes	OGI and FID	Bacharach	DPIR	Bacharach		87.4	6.5	2.2	0.385	8.47	3.1	8.47	34.2364
GHD0043	001	Anadarko	Boosting and Gathering	Gas	Compressor	Compressor	Flange	gas	y	y	0.485987	50000	0.924407	29.1592	yes	OGI and FID	Bacharach	n/a	Bacharach		73.229	6.683	4.318	0.578	5.08		5.08	26.955
GHD0044	001	Anadarko	Boosting and Gathering	Gas	Compressor	Compressor	Connectors	gas	n	y	0.47765		0.885727	28.659	yes	OGI Only	Bacharach	n/a	Bacharach		72.881	6.595	3.928	0.507	5		5	25.384
GHD0018	007	Gulf Coast	Central Production	Gas	Separator	Separator	Regulator	oil	y	y	0.456669	50000	1.02736	27.4002	yes	OGI and FID	Bacharach	DPIR	Bacharach		88.392	4.452	1.024	0.385	6.7	16.97	6.7	28.1498
GHD0005	003	San Juan	Central Production	Gas	Separator	Separator	Regulator	gas	y	y	0.436763	50000	1.05418	26.2058	yes	OGI and FID	Bacharach	Gas Sentry	Bacharach		89.4	4.944	2.053	0.3172	6.1	5.6	6.1	27.6257
GHD0021	005	Gulf Coast	Boosting and Gathering	Oil	Separator	Separator	Valves	oil	y	n	0.43308	35000	4.48	25.9848	yes	FID Only	Bacharach	DPIR	DPIR	X	87.4	6.5	2.2	0.385	2.66	24	24	116.412
GHD0029	004	Anadarko	Well Production	Gas	Storage Vessel	Other	Connectors	gas	n	y	0.429654		1.0169	25.7792	yes	OGI Only	Indaco HF	n/a	Indaco HF		79.371	11.191	4.021	0.916	9.75		9.75	26.215
GHD0043	001	Anadarko	Boosting and Gathering	Gas	Compressor	Compressor	Flange	gas	y	y	0.402305	50000	0.8969	24.1383	yes	OGI and FID	Bacharach	n/a	Bacharach		73.229	6.683	4.318	0.578	4.31		4.31	21.6496
GHD0027	007	Anadarko	Central Production	Gas	Separator	Separator	Other	gas	y	n	0.359469	50000	0.912089	21.5681	yes	FID Only	Bacharach	Gas Rover	Bacharach		63.058	8.142	8.261	3.5481	3.78	3.35	3.78	19.6721
GHD0003	008	San Juan	Central Production	Oil	Compressor	Compressor	Connectors	gas	y	n	0.334105	50000	0.88438	20.0463	yes	FID Only	Bacharach	Gas Sentry	Bacharach		61.351	10.066	7.243	2.24	3.32	3.75	3.32	17.7286
GHD0056	007	Permian	Well Production	Oil	Meters/Piping	Meters/Piping	Valves	gas	y	y	0.307163	50000	1.01638	18.4298	yes	OGI and FID	Bacharach	Gas Rover	Bacharach		73.108	12.269	7.727	0.821	4.13	4	4.13	18.7318
GHD0043	001	Anadarko	Boosting and Gathering	Gas	Dehydrator	Dehydrator	Connectors	gas	y	n	0.30678	50000	0.8969	18.4068	yes	FID Only	Bacharach	n/a	Bacharach		73.229	6.683	4.318	0.578	3.59		3.59	16.5091
GHD0019	005	Gulf Coast	Well Site	Oil	VRU Separator	MinorSeparator	Valves	gas	n	y	0.299593		4.48	17.9756	yes	OGI Only	Bacharach	DPIR	DPIR	X	87.4	6.5	2.2	0.385	2.1	35	35	80.5307
GHD0043	001	Anadarko	Boosting and Gathering	Gas	Compressor	Compressor	Flange	gas	y	y	0.287967	50000	0.8969	17.278	yes	OGI and FID	Bacharach	n/a	Bacharach		73.229	6.683	4.318	0.578	2.96		2.96	15.4967
GHD0027	007	Anadarko	Central Production	Gas	Pig Station	Meters/Piping	Valves	gas	y	n	0.281991	50000	0.912089	16.9194	yes	FID Only	Bacharach	Gas Rover	Bacharach		63.058	8.142	8.261	3.5481	3.05	2.7756	3.05	15.432
GHD0005	003	San Juan	Central Production	Gas	Compressor	Compressor	Regulator	gas	y	y	0.269587	50000	1.00411	16.1752	yes	OGI and FID	Bacharach	Gas Sentry	Bacharach		89.4	4.944	2.053	0.3172	3.74	4	3.74	16.2417
GHD0059	007	Permian	Well Production	Oil	VRU	Compressor	Connectors	gas	y	y	0.259014	50000	1.00887	15.5408	yes	OGI and FID	Bacharach	Gas Rover	Bacharach		71.494	12.846	7.701	0.959	4.19	10	4.19	15.6787
GHD0024	007	Anadarko	Well Site	Gas	Compressor	Compressor	Piping	gas	n	y	0.258775		0.846679	15.5265	yes	OGI Only	Bacharach	Gas Rover	Bacharach		63.247	6.734	6.259	2.1172	2.32	1.4	2.32	13.146
GHD0044	001	Anadarko	Boosting and Gathering	Gas	Compressor	Compressor	Valves	gas	y	y	0.235407	50000	0.885727	14.1244	yes	OGI and FID	Bacharach	n/a	Bacharach		72.881	6.595	3.928	0.507	2.43		2.43	12.5104
GHD0043	001	Anadarko	Boosting and Gathering	Gas	Compressor	Compressor	Flange	gas	y	y	0.220866	50000	0.8969	13.252	yes	OGI and FID	Bacharach	n/a	Bacharach		73.229	6.683	4.318	0.578	2.4		2.4	11.8857
GHD0032	004	Anadarko	Well Production	Gas	Separator	Separator	Regulator	gas	n	y	0.211649		1.05291	12.6989	yes	OGI Only	Indaco HF	n/a	Indaco HF		87.521	5.426	2.474	0.75	4.01		4.01	13.3708
GHD0003	008	San Juan	Central Production	Oil	Compressor	Compressor	Connectors	gas	y	n	0.204413	35000	0.88438	12.2648	yes	FID Only	Bacharach	Gas Sentry	Bacharach		61.351	10.066	7.243	2.24	1.95	2	1.95	10.8467
GHD0021	005	Gulf Coast	Boosting and Gathering	Oil	Flare	Other	Valves	gas	y	y	0.201072	50000	1.00616	12.0643	yes	OGI and FID	Bacharach	DPIR	Bacharach		87.4	6.5	2.2	0.385	3.2	5.7	3.2	12.1387
GHD0048	006	Gulf Coast	Well Production	Gas	Wellhead	Wellhead	Connectors	gas	y	n	0.188671	50000	1.00818	11.3203	yes	FID Only	Bacharach	Gas Rover	Bacharach		93.434	3.396	0.906	0.206	2.3	4	2.3	11.4129
GHD0011	005	San Juan	Well Site	Oil	Meters/Piping	Meters/Piping	Connectors	gas	n/a	y	0.187232		0.959534	11.2339	yes	OGI Only - No FID Survey	Indaco HF	n/a	Indaco HF		78.6	5.7	3.4	0.7135	4.4		4.4	10.7793
GHD0006	003	San Juan	Well Site	Gas	Compressor	Compressor	Connectors	oil	y	n	0.180338	7738	0.825158	10.8203	yes	FID Only	Bacharach	Gas Rover	Gas Rover		78.763	0.489	0.039	0.006	0	2	2	8.92846
GHD0003	008	San Juan	Central Production	Oil	Storage Vessel	Other	Other	oil	y	y	0.174432	40000	0.88438	10.4659	yes	OGI and FID	Bacharach	Gas Sentry	Bacharach		61.351	10.066	7.243	2.24	2.08	0.05	2.08	9.25587
GHD0033	002	Anadarko	Well Site	Oil	Separator	Separator	Connectors	gas	y	n	0.159571	50000	1.01341	9.57424	yes	FID Only	Bacharach	DPIR	Bacharach		79.89	8.95	5.3	1.03	2.7	0.00722	2.7	9.70264
GHD0021	005	Gulf Coast	Boosting and Gathering	Oil	VRU	Compressor	Valves	gas	y	n	0.153431	50000	1.00616	9.20583	yes	FID Only	Bacharach	DPIR	Bacharach		87.4	6.5	2.2	0.385	3.31	5.6	3.31	9.26258
GHD0028	004	Anadarko	Well Production	Oil	Flare	Other	Connectors	gas	y	y	0.151782	8034	1.05111	9.10691	yes	OGI and FID	Indaco HF	TVA	Indaco HF		84.454	9.605	2.679	0.543	2	0.107	2	9.57236
GHD0043	001	Anadarko	Boosting and Gathering	Gas	Compressor	Compressor	Flange	gas	y	y	0.149873	16400	0.8969	8.9924	yes	OGI and FID	Bacharach	n/a	Bacharach		73.229	6.683	4.318	0.578	1.5		1.5	8.06528
GHD0050	006	Gulf Coast	Well Production	Gas	Compressor	Compressor	Connectors	gas	n	y	0.145668		1.00573	8.74005	no	OGI Only	Bacharach	Gas Rover	Bacharach		95.974	1.775	0.5	0.043	2	2	2	8.79014
GHD0049	006	Gulf Coast	Well Production	Gas	Compressor	Compressor	Valves	gas	n	y	0.144303		1.01435	8.65815	yes	OGI Only	Bacharach	Gas Rover	Bacharach		93.241	3.808	1.065	0.258	1.87	1.55	1.87	8.78238
GHD0016	007	Gulf Coast	Well Site	Gas	Compressor	Compressor	Connectors	gas	y	n	0.132271	720	0.94509	7.93627	yes	FID Only	Bacharach	DPIR	Bacharach		87.418	3.131	0.937	0.268	1.55	0.6	1.55	7.50049
GHD0021	005	Gulf Coast	Boosting and Gathering	Oil	Separator	Separator	Valves	gas	n	y	0.130479		4.48	7.82875	yes	OGI Only	Bacharach	DPIR	DPIR	X	87.4	6.5	2.2	0.385	2.07	12	12	35.0728
GHD0010	005	San Juan	Well Site	Gas	VRU Compressor	Compressor	Connectors	gas	y	n	0.118747	50000	0.959534	7.12482	yes	FID Only	Indaco HF	n/a	Indaco HF		78.6	5.7	3.4	0.7135	3.65		3.65	6.83651
GHD0027	007	Anadarko	Central Production	Gas	Compressor	Compressor	Connectors	gas	y	y	0.117419	1471	0.912089	7.04514	yes	OGI and FID	Bacharach	Gas Rover	Bacharach		63.058	8.142	8.261	3.5481	1.27	1.5432	1.27	6.4258
GHD0016	007	Gulf Coast	Well Site	Gas	Compressor	Compressor	Valves	gas	n	y	0.116254		4.48	6.97522	yes	OGI Only	Bacharach	DPIR	DPIR	X	87.418	3.131	0.937	0.268	2.22	9.37	9.37	31.249
GHD0049	006	Gulf Coast	Well Production	Gas	Inlet Piping Manifold	Meters/Piping	Valves	gas	y	y	0.114949	50000	1.01435	6.89694	yes	OGI and FID	Bacharach	Gas Rover	Bacharach		93.241	3.808	1.065	0.258	1.55	0.85	1.55	6.99589
GHD0021	005	Gulf Coast	Boosting and Gathering	Oil	VRT	Separator	Connectors	gas	y	y	0.114401	6790	4.48	6.86404	yes	OGI and FID	Bacharach	DPIR	DPIR	X	87.4	6.5	2.2	0.385	1.93	11.5	11.5	30.7509
GHD0056	007	Permian	Well Production	Oil	Separator	Separator	Regulator	gas	y	y	0.113844	10500	1.01638	6.83064	yes	OGI and FID	Bacharach	Gas Rover	Bacharach		73.108	12.269	7.727	0.821	1.43	1.477	1.43	6.94256
GHD0039	001	Anadarko	Boosting and Gathering	Gas	Compressor	Compressor	Connectors	gas	n	y	0.108912		0.887299	6.53475	yes	OGI Only	Bacharach	DPIR	Bacharach		72.9	6.598	3.978	0.549	1.16	8.25	1.16	5.79827
GHD0011	005	San Juan	Well Site	Oil	Separator	Separator	Valves	gas	n/a	y	0.100335		0.959534	6.0201	yes	OGI Only - No FID Survey	Indaco HF	n/a	Indaco HF		78.6	5.7	3.4	0.7135	1.75		1.75	5.77649
GHD0056	007	Permian	Well Production	Oil	Meters/Piping	Meters/Piping	Regulator	gas	y	y	0.0938575	50000	1.01638	5.63145	yes	OGI and FID	Bacharach	Gas Rover	Bacharach		73.108	12.269	7.727	0.821	1.28	1.25	1.28	5.72372
GHD0043	001	Anadarko	Boosting and Gathering	Gas	Separator	Separator	Connectors	gas	n	y	0.0935919		0.8969	5.61552	yes	OGI Only	Bacharach	n/a	Bacharach		73.229	6.683	4.318	0.578	1.13		1.13	5.03655
GHD0013	007	Gulf Coast	Well Site	Gas	Wellhead	Wellhead	Connectors	gas	y	y	0.0895149	50000	1.01872	5.3709	yes	OGI and FID	Bacharach	n/a	Bacharach		81.441	10.297	3.645	0.767	1.37		1.37	5.47145
GHD0027	007	Anadarko	Central Production	Gas	Separator	Separator	Connectors	gas	y	n	0.0872124	50000	0.912089	5.23274	yes	FID Only	Bacharach	Gas Rover	Bacharach		63.058	8.142	8.261	3.5481	0.93	1.1499	0.93	4.77273
GHD0058	007	Permian	Well Site	Oil	Separator	Separator	Connectors	gas	y	y	0.0849472	50000	0.993364	5.09683	yes	OGI and FID	Bacharach	Gas Rover	Bacharach		71.019	10.03	9.115	1.252	1.33	1.22	1.33	5.06301
GHD0048	006	Gulf Coast	Well Production	Gas	Dehydrator	Dehydrator	Flange	gas	y	n	0.0802081	50000	1.00818	4.81249	yes	FID Only	Bacharach	Gas Rover	Bacharach		93.434	3.396	0.906	0.206	1.1	1.75	1.1	4.85185
GHD0050	006	Gulf Coast	Well Production	Gas	Wellhead	Wellhead	Connectors	gas	y	n	0.0792067	50000	1.00573	4.7524	yes	FID Only	Bacharach	Gas Rover	Bacharach		95.974	1.775	0.5	0.043	1.35	1.25	1.35	4.77964
GHD0019	005	Gulf Coast	Well Site	Oil	Separator	Separator	Instrument	gas	n	y	0.0734242		1.00616	4.40545	yes	OGI Only	Bacharach	DPIR	Bacharach		87.4	6.5	2.2	0.385	1.08	6.6	1.08	4.43261
GHD0003	008	San Juan	Central Production	Oil	Heater Treater	Heater Treater	Connectors	gas	y	y	0.0731833	10001	0.88438	4.391	yes	OGI and FID	Bacharach	Gas Sentry	Bacharach		61.351	10.066	7.243	2.24	0.77	0.95	0.77	3.88331
GHD0043	001	Anadarko	Boosting and Gathering	Gas	Compressor	Compressor	Flange	gas	y	y	0.0718734	50000	0.8969	4.31241	yes	OGI and FID	Bacharach	n/a	Bacharach		73.229	6.683	4.318	0.578	0.77		0.77	3.8678
GHD0044	001	Anadarko	Boosting and Gathering	Gas	Compressor	Compressor	OELs	gas	y	n	0.0717955	50000	0.885727	4.30773	yes	FID Only	Bacharach	n/a	Bacharach		72.881	6.595	3.928	0.507	0.92		0.92	3.81547
GHD0035	002	Anadarko	Well Production	Gas	Separator	Separator	Regulator	gas	y	y	0.0717944	1205	1.0007	4.30766	yes	OGI and FID	Bacharach	DPIR	Bacharach		79.53	8.57	4.99	1.03	1.38	0.00065	1.38	4.31067
GHD0043	001	Anadarko	Boosting and Gathering	Gas	Contactor	Dehydrator	Valves	gas	y	y	0.0716499	50000	0.8969	4.299	yes	OGI and FID	Bacharach	n/a	Bacharach		73.229	6.683	4.318	0.578	1.09		1.09	3.85577
GHD0007	003	San Juan	Well Site	Gas	Compressor	Compressor	Connectors	gas	y	n	0.0667876	649	0.809598	4.00726	yes	FID Only	Bacharach	DPIR	Bacharach		78.26	0.901	0.171	0.008	0.65	0.61	0.65	3.24427
GHD0043	001	Anadarko	Boosting and Gathering	Gas	Compressor	Compressor	Connectors	gas	y	n	0.0617636	50000	0.8969	3.70581	yes	FID Only	Bacharach	n/a	Bacharach		73.229	6.683	4.318	0.578	0.87		0.87	3.32374
GHD0027	007	Anadarko	Central Production	Gas	Meters/Piping	Meters/Piping	Connectors	gas	y	y	0.0572038	50000	0.912089	3.43223	yes	OGI and FID	Bacharach	Gas Rover	Bacharach		63.058	8.142	8.261	3.5481	0.61	0.9036	0.61	3.1305
GHD0019	005	Gulf Coast	Well Site	Oil	Pig Station	Meters/Piping	Valves	gas	y	y	0.0555214	3198	1.00616	3.33128	yes	OGI and FID	Bacharach	DPIR	Bacharach		87.4	6.5	2.2	0.385	0.7	5	0.7	3.35182
GHD0027	007	Anadarko	Central Production	Gas	Compressor	Compressor	Connectors	gas	y	y	0.0552358	2360	0.912089	3.31415	yes	OGI and FID	Bacharach	Gas Rover	Bacharach		63.058	8.142	8.261	3.5481	0.82	0.776	0.82	3.0228
GHD0009	005	San Juan	Well Site	Gas	Compressor	Compressor	Connectors	gas	y	n	0.0528079	10500	0.959534	3.16847	yes	FID Only	Indaco HF	n/a	Indaco HF		78.6	5.7	3.4	0.7135	0.8		0.8	3.04026
GHD0049	006	Gulf Coast	Well Production	Gas	Separator	Separator	Valves	gas	n	y	0.0479439		1.01435	2.87663	yes	OGI Only	Bacharach	Gas Rover	Bacharach		93.241	3.808	1.065	0.258	0.92	0.5931	0.92	2.9179
GHD0011	005	San Juan	Well Site	Oil	Compressor	Compressor	Connectors	gas	n/a	y	0.047032		0.959534	2.82192	yes	OGI Only - No FID Survey	Indaco HF	n/a	Indaco HF		78.6	5.7	3.4	0.7135	1.4		1.4	2.70773
GHD0001	008	San Juan	Well Production	Gas	Separator	Separator	Connectors	gas	y	y	0.0467254	50000	0.997555	2.80352	yes	OGI and FID	Bacharach	DPIR	Bacharach		96.057	1.498	0.137	0.01	0.66	0.6365	0.66	2.79667
GHD0043	001	Anadarko	Boosting and Gathering	Gas	Compressor	Compressor	Flange	gas	y	y	0.0465659	50000	0.8969	2.79395	yes	OGI and FID	Bacharach	n/a	Bacharach		73.229	6.683	4.318	0.578	0.46		0.46	2.5059
GHD0031	004	Anadarko	Well Production	Gas	Storage Vessel	Other	Connectors	gas	y	y	0.044331	2300	0.954496	2.65986	yes	OGI and FID	Indaco HF	n/a	Indaco HF		74.518	8.438	6.551	0.772	0.65		0.65	2.53883
GHD0043	001	Anadarko	Boosting and Gathering	Gas	Compressor	Compressor	Flange	gas	y	y	0.0423852	50000	0.8969	2.54311	yes	OGI and FID	Bacharach	n/a	Bacharach		73.229	6.683	4.318	0.578	0.52		0.52	2.28092
GHD0016	007	Gulf Coast	Well Site	Gas	Compressor	Compressor	Other	gas	y	n	0.0416072	2292	0.94509	2.49643	yes	FID Only	Bacharach	DPIR	Bacharach		87.418	3.131	0.937	0.268	0.82	0.3	0.82	2.35935
GHD0016	007	Gulf Coast	Well Site	Gas	Compressor	Compressor	Connectors	gas	y	y	0.041169	4527	0.94509	2.47014	yes	OGI and FID	Bacharach	DPIR	Bacharach		87.418	3.131	0.937	0.268	0.51	0.4299	0.51	2.3345
GHD0043	001	Anadarko	Boosting and Gathering	Gas	Compressor	Compressor	Flange	gas	y	y	0.0404921	50000	0.8969	2.42952	yes	OGI and FID	Bacharach	n/a	Bacharach		73.229	6.683	4.318	0.578	0.4		0.4	2.17904
GHD0019	005	Gulf Coast	Well Site	Oil	Heater Treater	Heater Treater	Connectors	gas	n	y	0.0395036		1.00616	2.37022	yes	OGI Only	Bacharach	DPIR	Bacharach		87.4	6.5	2.2	0.385	0.59	5.1	0.59	2.38483
GHD0019	005	Gulf Coast	Well Site	Oil	Compressor	Compressor	PRVs	gas	y	n	0.0389577	5644	1.00616	2.33746	yes	FID Only	Bacharach	DPIR	Bacharach		87.4	6.5	2.2	0.385	0.62	0.284	0.62	2.35187
GHD0004	008	San Juan	Central Production	Oil	Storage Vessel	Other	Other	gas	n	y	0.0371787		0.88438	2.23072	yes	OGI Only	Bacharach	n/a	Bacharach		61.351	10.066	7.243	2.24	0.38		0.38	1.97281
GHD0001	008	San Juan	Well Production	Gas	Separator	Separator	Connectors	gas	y	y	0.035911	50000	0.997555	2.15466	yes	OGI and FID	Bacharach	DPIR	Bacharach		96.057	1.498	0.137	0.01	0.5	5e-05	0.5	2.14939
GHD0059	007	Permian	Well Production	Oil	Heater Treater	Heater Treater	Regulator	gas	y	n	0.0346283	50000	1.00887	2.0777	yes	FID Only	Bacharach	Gas Rover	Bacharach		71.494	12.846	7.701	0.959	0.57	0.48	0.57	2.09613
GHD0001	008	San Juan	Well Production	Gas	Separator	Separator	Connectors	gas	y	n	0.0344233	50000	0.997555	2.0654	yes	FID Only	Bacharach	DPIR	Bacharach		96.057	1.498	0.137	0.01	0.55	0.5981	0.55	2.06035
GHD0050	006	Gulf Coast	Well Production	Gas	Compressor	Compressor	Other	gas	y	y	0.0327145	50000	1.00573	1.96287	yes	OGI and FID	Bacharach	Gas Rover	Bacharach		95.974	1.775	0.5	0.043	0.42	0.4607	0.42	1.97412
GHD0005	003	San Juan	Central Production	Gas	Compressor	Compressor	Regulator	gas	y	n	0.0317161	50000	1.00411	1.90297	yes	FID Only	Bacharach	Gas Sentry	Bacharach		89.4	4.944	2.053	0.3172	0.4	0.95	0.4	1.91078
GHD0061	007	Permian	Well Site	Oil	Separator	Separator	Connectors	oil	y	n	0.0314433	50000	1.00157	1.8866	yes	FID Only	Bacharach	Gas Rover	Bacharach		70.99	10.335	9.353	1.343	0.42	0.391	0.42	1.88957
GHD0043	001	Anadarko	Boosting and Gathering	Gas	PRD	Other	Connectors	gas	y	n	0.0302902	50000	0.8969	1.81741	yes	FID Only	Bacharach	n/a	Bacharach		73.229	6.683	4.318	0.578	0.36		0.36	1.63003
GHD0048	006	Gulf Coast	Well Production	Gas	Meters/Piping	Meters/Piping	Instrument	gas	n	y	0.029804		1.01676	1.78824	yes	OGI Only	Bacharach	Gas Rover	Gas Rover		93.434	3.396	0.906	0.206	0	0.56	0.56	1.81822
GHD0056	007	Permian	Well Production	Oil	Compressor	Compressor	Connectors	gas	y	n	0.0277801	50000	1.01638	1.66681	yes	FID Only	Bacharach	Gas Rover	Bacharach		73.108	12.269	7.727	0.821	0.39	0.3826	0.39	1.69412
GHD0032	004	Anadarko	Well Production	Gas	Meters/Piping	Meters/Piping	Connectors	gas	y	n	0.0274419	6020	1.05291	1.64651	yes	FID Only	Indaco HF	n/a	Indaco HF		87.521	5.426	2.474	0.75	0.5		0.5	1.73363
GHD0001	008	San Juan	Well Production	Gas	Wellhead	Wellhead	Connectors	gas	y	n	0.0271487	50000	0.997555	1.62892	yes	FID Only	Bacharach	DPIR	Bacharach		96.057	1.498	0.137	0.01	0.54	0.5051	0.54	1.62494
GHD0021	005	Gulf Coast	Boosting and Gathering	Oil	Meters/Piping	Meters/Piping	Instrument	gas	y	y	0.0256902	25000	1.00616	1.54141	yes	OGI and FID	Bacharach	DPIR	Bacharach		87.4	6.5	2.2	0.385	0.43	0.1126	0.43	1.55091
GHD0057	007	Permian	Well Production	Oil	Separator	Separator	Valves	oil	y	y	0.0233787	6860	0.992162	1.40272	yes	OGI and FID	Bacharach	Gas Rover	Bacharach		67.724	11.222	10.008	1.581	0.28	0.255	0.28	1.39173
GHD0027	007	Anadarko	Central Production	Gas	Meters/Piping	Meters/Piping	Connectors	gas	y	y	0.0227838	5360	0.912089	1.36703	yes	OGI and FID	Bacharach	Gas Rover	Bacharach		63.058	8.142	8.261	3.5481	0.25	0.3349	0.25	1.24685
GHD0021	005	Gulf Coast	Boosting and Gathering	Oil	VRU	Compressor	Valves	gas	y	n	0.0203544	30800	1.00616	1.22126	yes	FID Only	Bacharach	DPIR	Bacharach		87.4	6.5	2.2	0.385	0.38	0.1776	0.38	1.22879
GHD0043	001	Anadarko	Boosting and Gathering	Gas	Separator	Separator	OELs	gas	y	n	0.0202329	50000	0.8969	1.21397	yes	FID Only	Bacharach	n/a	Bacharach		73.229	6.683	4.318	0.578	0.27		0.27	1.08881
GHD0043	001	Anadarko	Boosting and Gathering	Gas	Compressor	Compressor	Flange	gas	y	y	0.020154	50000	0.8969	1.20924	yes	OGI and FID	Bacharach	n/a	Bacharach		73.229	6.683	4.318	0.578	0.21		0.21	1.08457
GHD0056	007	Permian	Well Production	Oil	Meters/Piping	Meters/Piping	Regulator	gas	y	y	0.0197771	50000	1.01638	1.18663	yes	OGI and FID	Bacharach	Gas Rover	Bacharach		73.108	12.269	7.727	0.821	0.32	0.2033	0.32	1.20607
GHD0059	007	Permian	Well Production	Oil	Meters/Piping	Meters/Piping	Connectors	gas	y	n	0.0191633	50000	1.00887	1.1498	yes	FID Only	Bacharach	Gas Rover	Bacharach		71.494	12.846	7.701	0.959	0.29	0.2309	0.29	1.16
GHD0021	005	Gulf Coast	Boosting and Gathering	Oil	Separator	Separator	Valves	oil	y	n	0.0191183	16000	1.00616	1.1471	yes	FID Only	Bacharach	DPIR	Bacharach		87.4	6.5	2.2	0.385	0.32	0.3	0.32	1.15417
GHD0015	007	Gulf Coast	Well Site	Oil	Separator	Separator	Connectors	gas	y	n	0.0184806	11100	1.02674	1.10884	yes	FID Only	Bacharach	DPIR	Bacharach		80.846	11.775	3.722	0.417	0.36	0.0686	0.36	1.13849
GHD0043	001	Anadarko	Boosting and Gathering	Gas	Compressor	Compressor	Connectors	gas	y	y	0.0184449	3440	0.8969	1.1067	yes	OGI and FID	Bacharach	n/a	Bacharach		73.229	6.683	4.318	0.578	0.23		0.23	0.992595
GHD0021	005	Gulf Coast	Boosting and Gathering	Oil	Heater Treater	Heater Treater	Connectors	gas	n	y	0.0172539		1.00616	1.03523	yes	OGI Only	Bacharach	DPIR	Bacharach		87.4	6.5	2.2	0.385	0.25	0.1124	0.25	1.04161
GHD0027	007	Anadarko	Central Production	Gas	Meters/Piping	Meters/Piping	Connectors	gas	y	y	0.0171704	50000	0.912089	1.03022	yes	OGI and FID	Bacharach	Gas Rover	Bacharach		63.058	8.142	8.261	3.5481	0.2	0.2715	0.2	0.939656
GHD0029	004	Anadarko	Well Production	Gas	Storage Vessel	Other	Connectors	gas	n	y	0.0168391		1.0169	1.01034	yes	OGI Only	Indaco HF	Gas Rover	Indaco HF		79.371	11.191	4.021	0.916	0.3	0.2526	0.3	1.02742
GHD0027	007	Anadarko	Central Production	Gas	Meters/Piping	Meters/Piping	Connectors	gas	y	n	0.0164043	635	0.912089	0.98426	yes	FID Only	Bacharach	Gas Rover	Bacharach		63.058	8.142	8.261	3.5481	0.18	0.324	0.18	0.897733
GHD0019	005	Gulf Coast	Well Site	Oil	VRT	Separator	Valves	gas	y	n	0.0163886	50000	1.00616	0.983315	yes	FID Only	Bacharach	DPIR	Bacharach		87.4	6.5	2.2	0.385	0.37	0.2194	0.37	0.989377
GHD0019	005	Gulf Coast	Well Site	Oil	Wellhead	Wellhead	Instrument	gas	y	n	0.0163783	50000	1.00616	0.982697	yes	FID Only	Bacharach	DPIR	Bacharach		87.4	6.5	2.2	0.385	0.3	0.1906	0.3	0.988755
GHD0021	005	Gulf Coast	Boosting and Gathering	Oil	Sweetener Scrubber	MinorSeparator	Connectors	gas	y	n	0.0158632	50000	1.00616	0.951795	yes	FID Only	Bacharach	DPIR	Bacharach		87.4	6.5	2.2	0.385	0.22	0.14	0.22	0.957662
GHD0048	006	Gulf Coast	Well Production	Gas	Meters/Piping	Meters/Piping	PRVs	gas	n	y	0.015596		1.00818	0.935761	yes	OGI Only	Bacharach	Gas Rover	Bacharach		93.434	3.396	0.906	0.206	0.2	1.5	0.2	0.943415
GHD0027	007	Anadarko	Central Production	Gas	Meters/Piping	Meters/Piping	Connectors	gas	y	n	0.0151756	3065	0.833522	0.910538	yes	FID Only	Bacharach	Gas Rover	Gas Rover		63.058	8.142	8.261	3.5481	0	0.15	0.15	0.758953
GHD0004	008	San Juan	Central Production	Oil	Compressor	Compressor	Connectors	gas	y	n	0.0150951	2000	0.88438	0.905707	yes	FID Only	Bacharach	Gas Sentry	Bacharach		61.351	10.066	7.243	2.24	0.2	0.25	0.2	0.800989
GHD0016	007	Gulf Coast	Well Site	Gas	Compressor	Compressor	Connectors	gas	y	y	0.0145302	4809	0.94509	0.871814	yes	OGI and FID	Bacharach	DPIR	Bacharach		87.418	3.131	0.937	0.268	0.18	0.1285	0.18	0.823942
GHD0056	007	Permian	Well Production	Oil	Compressor	Compressor	Valves	gas	y	n	0.0145291	50000	1.01638	0.871743	yes	FID Only	Bacharach	Gas Rover	Bacharach		73.108	12.269	7.727	0.821	0.19	0.1863	0.19	0.886026
GHD0021	005	Gulf Coast	Boosting and Gathering	Oil	Oil Treater	Other	Connectors	gas	y	n	0.0121962	50000	1.00616	0.731769	yes	FID Only	Bacharach	DPIR	Bacharach		87.4	6.5	2.2	0.385	0.16	0.0783	0.16	0.73628
GHD0021	005	Gulf Coast	Boosting and Gathering	Oil	Separator	Separator	Other	gas	y	n	0.011609	50000	1.00616	0.696541	yes	FID Only	Bacharach	DPIR	Bacharach		87.4	6.5	2.2	0.385	0.23	0.13	0.23	0.700834
GHD0027	007	Anadarko	Central Production	Gas	Meters/Piping	Meters/Piping	Connectors	gas	y	n	0.0111438	7322	0.833522	0.66863	yes	FID Only	Bacharach	Gas Rover	Gas Rover		63.058	8.142	8.261	3.5481	0	0.1264	0.1264	0.557317
GHD0052	006	Gulf Coast	Central Production	Gas	Separator	Separator	Connectors	gas	y	n	0.0105964	26500	1.00443	0.635783	yes	FID Only	Bacharach	Gas Rover	Gas Rover		87.429	7.006	2.908	0.273	0	0.1443	0.1443	0.6386
GHD0020	005	Gulf Coast	Central Production	Oil	Meters/Piping	Meters/Piping	Connectors	oil	y	n	0.0105068	50000	1.00616	0.630409	yes	FID Only	Bacharach	DPIR	Bacharach		87.4	6.5	2.2	0.385	0.17	0.0862	0.17	0.634295
GHD0019	005	Gulf Coast	Well Site	Oil	Pig Station	Meters/Piping	Connectors	gas	n	y	0.0105068		1.00616	0.630409	yes	OGI Only	Bacharach	DPIR	Bacharach		87.4	6.5	2.2	0.385	0.15	0.1565	0.15	0.634295
GHD0015	007	Gulf Coast	Well Site	Oil	Wellhead	Wellhead	Instrument	gas	y	n	0.010428	5000	1.02674	0.625683	yes	FID Only	Bacharach	DPIR	Bacharach		80.846	11.775	3.722	0.417	0.14	0.0208	0.14	0.642414
GHD0033	002	Anadarko	Well Site	Oil	Separator	Separator	Valves	gas	y	n	0.0103996	43000	1.01341	0.623974	yes	FID Only	Bacharach	DPIR	Bacharach		79.89	8.95	5.3	1.03	0.17	0.0785	0.17	0.632342
GHD0043	001	Anadarko	Boosting and Gathering	Gas	Compressor	Compressor	Flange	gas	y	y	0.0102808	50000	0.8969	0.616847	no	OGI and FID	Bacharach	n/a	Bacharach		73.229	6.683	4.318	0.578	0.17		0.17	0.55325
GHD0019	005	Gulf Coast	Well Site	Oil	Wellhead	Wellhead	Connectors	gas	y	y	0.0100433	3872	1.00616	0.602597	yes	OGI and FID	Bacharach	DPIR	Bacharach		87.4	6.5	2.2	0.385	0.15	0.093	0.15	0.606312
GHD0021	005	Gulf Coast	Boosting and Gathering	Oil	VRT	Separator	Valves	gas	y	n	0.0100124	10000	1.00616	0.600743	yes	FID Only	Bacharach	DPIR	Bacharach		87.4	6.5	2.2	0.385	0.18	0.0896	0.18	0.604446
GHD0027	007	Anadarko	Central Production	Gas	Meters/Piping	Meters/Piping	Connectors	gas	y	n	0.00993426	3150	0.833522	0.596055	yes	FID Only	Bacharach	Gas Rover	Gas Rover		63.058	8.142	8.261	3.5481	0	0.1165	0.1165	0.496825
GHD0052	006	Gulf Coast	Central Production	Gas	Separator	Separator	Valves	oil	n	y	0.00943002		1.00443	0.565801	yes	OGI Only	Bacharach	Gas Rover	Gas Rover		87.429	7.006	2.908	0.273	0	0.138	0.138	0.568308
GHD0056	007	Permian	Well Production	Oil	Meters/Piping	Meters/Piping	Regulator	gas	y	y	0.00942765	50000	1.01638	0.565659	yes	OGI and FID	Bacharach	Gas Rover	Bacharach		73.108	12.269	7.727	0.821	0.12	0.0877	0.12	0.574927
GHD0012	005	San Juan	Well Site	Oil	Heater Treater	Heater Treater	Valves	gas	n/a	y	0.00927203		0.959534	0.556322	yes	OGI Only - No FID Survey	Indaco HF	n/a	Indaco HF		78.6	5.7	3.4	0.7135	0.15		0.15	0.53381
GHD0036	002	Anadarko	Well Production	Gas	Compressor	Compressor	Regulator	gas	y	n	0.00912727	1247	0.978597	0.547636	yes	FID Only	Bacharach	DPIR	Bacharach		95.37	0.62	0.06	0.01	0.13	0.0625	0.13	0.535915
GHD0036	002	Anadarko	Well Production	Gas	Separator	Separator	Connectors	gas	n	y	0.00869111		0.978597	0.521467	yes	OGI Only	Bacharach	DPIR	Bacharach		95.37	0.62	0.06	0.01	0.19	0.5706	0.19	0.510306
GHD0020	005	Gulf Coast	Central Production	Oil	Fuel Gas Scrubber	MinorSeparator	Connectors	oil	y	n	0.00816854	30000	1.00616	0.490112	yes	FID Only	Bacharach	DPIR	Bacharach		87.4	6.5	2.2	0.385	0.13	0.0581	0.13	0.493134
GHD0013	007	Gulf Coast	Well Site	Gas	Separator	Separator	Connectors	gas	y	n	0.00796324	12300	1.01872	0.477794	yes	FID Only	Bacharach	DPIR	Bacharach		81.441	10.297	3.645	0.767	0.13	0.1032	0.13	0.486739
GHD0003	008	San Juan	Central Production	Oil	Meters/Piping	Meters/Piping	Connectors	gas	y	n	0.00763142	7943	0.88438	0.457885	yes	FID Only	Bacharach	Gas Sentry	Bacharach		61.351	10.066	7.243	2.24	0	0	0.07	0.404944
GHD0014	007	Gulf Coast	Central Production	Gas	Separator	Separator	Valves	gas	y	n	0.00749745	50000	1.01183	0.449847	yes	FID Only	Bacharach	DPIR	Bacharach		77.921	11.873	4.74	0.376	0.12	0.125	0.12	0.455168
GHD0027	007	Anadarko	Central Production	Gas	Meters/Piping	Meters/Piping	Connectors	gas	y	n	0.00737006	1650	0.912089	0.442204	yes	FID Only	Bacharach	Gas Rover	Bacharach		63.058	8.142	8.261	3.5481	0.09	0.1246	0.09	0.403329
GHD0003	008	San Juan	Central Production	Oil	Wellhead	Wellhead	OELs	gas	y	n	0.0073379	13400	0.88438	0.440274	yes	FID Only	Bacharach	Gas Sentry	Bacharach		61.351	10.066	7.243	2.24	0	0	0.07	0.38937
GHD0027	007	Anadarko	Central Production	Gas	Compressor	Compressor	Regulator	gas	y	n	0.0072301	1777	0.833522	0.433806	yes	FID Only	Bacharach	Gas Rover	Gas Rover		63.058	8.142	8.261	3.5481	0	0.0725	0.0725	0.361587
GHD0007	003	San Juan	Well Site	Gas	Separator	Separator	Connectors	gas	y	n	0.00708353	2393	0.809598	0.425012	yes	FID Only	Bacharach	DPIR	Bacharach		78.26	0.901	0.171	0.008	0	0.0042	0.07	0.344089
GHD0004	008	San Juan	Central Production	Oil	Heater Treater	Heater Treater	Connectors	gas	y	y	0.00704439	38200	0.88438	0.422663	yes	OGI and FID	Bacharach	DPIR	Bacharach		61.351	10.066	7.243	2.24	0	0.0045	0.07	0.373795
GHD0034	002	Anadarko	Well Site	Oil	Separator	Separator	Regulator	gas	n	y	0.00697827		1.00876	0.418696	yes	OGI Only	Bacharach	DPIR	Bacharach		78.96	9.31	5.15	1.19	0.09	0.046	0.09	0.422366
GHD0021	005	Gulf Coast	Boosting and Gathering	Oil	VRT	Separator	Connectors	gas	y	y	0.00691184	3116	1.00616	0.414711	yes	OGI and FID	Bacharach	DPIR	Bacharach		87.4	6.5	2.2	0.385	0.11	0.06	0.11	0.417267
GHD0043	001	Anadarko	Boosting and Gathering	Gas	Separator	Separator	OELs	gas	y	n	0.00690206	3076	0.8969	0.414124	yes	FID Only	Bacharach	DPIR	Bacharach		73.229	6.683	4.318	0.578	0	0.0009	0.07	0.371427
GHD0004	008	San Juan	Central Production	Oil	Heater Treater	Heater Treater	Connectors	gas	y	y	0.00684871	5700	0.88438	0.410922	yes	OGI and FID	Bacharach	DPIR	Bacharach		61.351	10.066	7.243	2.24	0	5	0.07	0.363412
GHD0003	008	San Juan	Central Production	Oil	Separator	Separator	Connectors	gas	y	n	0.00665303	1072	0.88438	0.399182	yes	FID Only	Bacharach	Gas Sentry	Bacharach		61.351	10.066	7.243	2.24	0	0	0.07	0.353028
GHD0059	007	Permian	Well Production	Oil	Compressor	Compressor	Connectors	gas	y	n	0.0066187	13000	1.00887	0.397122	yes	FID Only	Bacharach	Gas Rover	Bacharach		71.494	12.846	7.701	0.959	0.09	0.1379	0.09	0.400645
GHD0044	001	Anadarko	Boosting and Gathering	Gas	Meters/Piping	Meters/Piping	Connectors	gas	y	n	0.00659291	3662	0.885727	0.395575	yes	FID Only	Bacharach	DPIR	Bacharach		72.881	6.595	3.928	0.507	0	0.0292	0.07	0.350371
GHD0003	008	San Juan	Central Production	Oil	Separator	Separator	Connectors	gas	y	n	0.00655519	650	0.88438	0.393312	yes	FID Only	Bacharach	Gas Sentry	Bacharach		61.351	10.066	7.243	2.24	0	0	0.07	0.347837
GHD0043	001	Anadarko	Boosting and Gathering	Gas	Contactor	Dehydrator	Connectors	gas	y	n	0.00653395	3387	0.8969	0.392037	yes	FID Only	Bacharach	DPIR	Bacharach		73.229	6.683	4.318	0.578	0	0.0016	0.07	0.351618
GHD0003	008	San Juan	Central Production	Oil	Compressor	Compressor	Other	gas	y	n	0.00645735	23310	0.88438	0.387441	yes	FID Only	Bacharach	Gas Sentry	Bacharach		61.351	10.066	7.243	2.24	0	0	0.07	0.342645
GHD0003	008	San Juan	Central Production	Oil	Heater Treater	Heater Treater	Connectors	gas	y	n	0.00635951	802	0.88438	0.381571	yes	FID Only	Bacharach	Gas Sentry	Bacharach		61.351	10.066	7.243	2.24	0	0	0.07	0.337454
GHD0044	001	Anadarko	Boosting and Gathering	Gas	Meters/Piping	Meters/Piping	Valves	gas	y	n	0.00621617	3903	0.885727	0.37297	yes	FID Only	Bacharach	DPIR	Bacharach		72.881	6.595	3.928	0.507	0	0.0114	0.07	0.33035
GHD0031	004	Anadarko	Well Production	Gas	Wellhead	Wellhead	Connectors	gas	y	n	0.00607861	14500	0.954496	0.364717	yes	FID Only	Indaco HF	n/a	Indaco HF		74.518	8.438	6.551	0.772	0.1		0.1	0.348121
GHD0005	003	San Juan	Central Production	Gas	Compressor	Compressor	Other	gas	y	n	0.00597252	50000	1.00411	0.358351	yes	FID Only	Bacharach	Gas Sentry	Bacharach		89.4	4.944	2.053	0.3172	0.1	0.1	0.1	0.359823
GHD0003	008	San Juan	Central Production	Oil	Heater Treater	Heater Treater	Connectors	gas	y	n	0.00596816	628	0.88438	0.35809	yes	FID Only	Bacharach	Gas Sentry	Bacharach		61.351	10.066	7.243	2.24	0	0	0.07	0.316687
GHD0070	003	Permian	Well Site	Oil	Separator	Separator	Connectors	gas	y	n	0.00596452	18000	0.937575	0.357871	yes	FID Only	Bacharach	Gas Rover	Bacharach		56.607	13.991	11.21	2.059	0.07	0.0497	0.07	0.335531
GHD0027	007	Anadarko	Central Production	Gas	Meters/Piping	Meters/Piping	Connectors	gas	y	n	0.00589682	2104	0.833522	0.353809	yes	FID Only	Bacharach	Gas Rover	Gas Rover		63.058	8.142	8.261	3.5481	0	0.068	0.068	0.294907
GHD0029	004	Anadarko	Well Production	Gas	Storage Vessel	Other	Connectors	gas	y	n	0.00588626	5000	1.0169	0.353176	yes	FID Only	Indaco HF	n/a	Indaco HF		79.371	11.191	4.021	0.916	0.15		0.15	0.359146
GHD0002	008	San Juan	Well Production	Gas	Separator	Separator	Other	gas	y	y	0.00585812	50000	0.987365	0.351487	yes	OGI and FID	Bacharach	DPIR	Bacharach		95.685	1.011	0.111	0.01	0	1.41	0.07	0.347046
GHD0043	001	Anadarko	Boosting and Gathering	Gas	Meters/Piping	Meters/Piping	Connectors	gas	y	n	0.00579773	11200	0.8969	0.347864	yes	FID Only	Bacharach	DPIR	Bacharach		73.229	6.683	4.318	0.578	0	0.0051	0.07	0.311999
GHD0043	001	Anadarko	Boosting and Gathering	Gas	Contactor	Dehydrator	Connectors	gas	y	n	0.0057057	1251	0.8969	0.342342	yes	FID Only	Bacharach	DPIR	Bacharach		73.229	6.683	4.318	0.578	0	0.0318	0.07	0.307047
GHD0043	001	Anadarko	Boosting and Gathering	Gas	Dehydrator	Dehydrator	Connectors	gas	y	n	0.00561367	2317	0.8969	0.33682	yes	FID Only	Bacharach	DPIR	Bacharach		73.229	6.683	4.318	0.578	0.02	0.0109	0.07	0.302094
GHD0043	001	Anadarko	Boosting and Gathering	Gas	Compressor	Compressor	OELs	gas	y	n	0.00561367	3278	0.8969	0.33682	yes	FID Only	Bacharach	DPIR	Bacharach		73.229	6.683	4.318	0.578	0	0.006	0.07	0.302094
GHD0039	001	Anadarko	Boosting and Gathering	Gas	Separator	Separator	Valves	gas	y	y	0.00553951	50000	0.887299	0.332371	yes	OGI and FID	Bacharach	DPIR	Bacharach		72.9	6.598	3.978	0.549	0	0.0625	0.07	0.294912
GHD0005	003	San Juan	Central Production	Gas	Separator	Separator	Connectors	gas	y	n	0.00547824	50000	1.00411	0.328695	yes	FID Only	Bacharach	Gas Sentry	Bacharach		89.4	4.944	2.053	0.3172	0	0	0.07	0.330045
GHD0005	003	San Juan	Central Production	Gas	Compressor	Compressor	Connectors	gas	y	n	0.00547824	35520	1.00411	0.328695	yes	FID Only	Bacharach	Gas Sentry	Bacharach		89.4	4.944	2.053	0.3172	0	0	0.07	0.330045
GHD0017	007	Gulf Coast	Boosting and Gathering	Gas	Manifold Oil Line	Header	Connectors	oil	y	n	0.00541185	4433	1.01313	0.324711	yes	FID Only	Bacharach	DPIR	Bacharach		81.153	10.797	3.293	0.509	0	0.0097	0.07	0.328975
GHD0021	005	Gulf Coast	Boosting and Gathering	Oil	Sweetener Scrubber	MinorSeparator	Instrument	gas	y	y	0.00519161	23200	1.00616	0.311496	yes	OGI and FID	Bacharach	DPIR	Bacharach		87.4	6.5	2.2	0.385	0.07	0.055	0.07	0.313417
GHD0019	005	Gulf Coast	Well Site	Oil	VRU	Compressor	Other	gas	y	n	0.00519161	1112	1.00616	0.311496	yes	FID Only	Bacharach	DPIR	Bacharach		87.4	6.5	2.2	0.385	0	0.0021	0.07	0.313417
GHD0016	007	Gulf Coast	Well Site	Gas	Compressor	Compressor	Connectors	gas	y	n	0.0051663	1046	0.94509	0.309978	yes	FID Only	Bacharach	DPIR	Bacharach		87.418	3.131	0.937	0.268	0	0.0053	0.07	0.292957
GHD0039	001	Anadarko	Boosting and Gathering	Gas	Separator	Separator	Connectors	gas	y	n	0.00516395	6000	0.887299	0.309837	yes	FID Only	Bacharach	DPIR	Bacharach		72.9	6.598	3.978	0.549	0	0.0037	0.07	0.274918
GHD0034	002	Anadarko	Well Site	Oil	Separator	Separator	Regulator	gas	y	n	0.00513416	3500	1.00876	0.30805	yes	FID Only	Bacharach	DPIR	Bacharach		78.96	9.31	5.15	1.19	0	0.007	0.07	0.310749
GHD0036	002	Anadarko	Well Production	Gas	Compressor	Compressor	Connectors	gas	y	n	0.00506361	1146	0.978597	0.303817	yes	FID Only	Bacharach	DPIR	Bacharach		95.37	0.62	0.06	0.01	0	0.0089	0.07	0.297314
GHD0036	002	Anadarko	Well Production	Gas	Wellhead	Wellhead	Connectors	gas	y	n	0.00506361	50000	0.978597	0.303817	yes	FID Only	Bacharach	DPIR	Bacharach		95.37	0.62	0.06	0.01	0	0.0205	0.07	0.297314
GHD0017	007	Gulf Coast	Boosting and Gathering	Gas	Fuel Gas Scrubber	MinorSeparator	Valves	gas	y	n	0.00505106	15600	1.01313	0.303064	yes	FID Only	Bacharach	DPIR	Bacharach		81.153	10.797	3.293	0.509	0	0.021	0.07	0.307043
GHD0005	003	San Juan	Central Production	Gas	Compressor	Compressor	Connectors	gas	y	n	0.00504575	28970	1.00411	0.302745	no	FID Only	Bacharach	Gas Sentry	Bacharach		89.4	4.944	2.053	0.3172	0	0	0.07	0.303988
GHD0005	003	San Juan	Central Production	Gas	Compressor	Compressor	Connectors	gas	y	n	0.00504575	19250	1.00411	0.302745	yes	FID Only	Bacharach	Gas Sentry	Bacharach		89.4	4.944	2.053	0.3172	0	0	0.07	0.303988
GHD0038	002	Anadarko	Well Site	Gas	Separator	Separator	Valves	gas	y	y	0.00501352	23000	1.02074	0.300811	yes	OGI and FID	Bacharach	DPIR	Bacharach		79.71	9.84	5.22	0.98	0	0.0255	0.07	0.30705
GHD0061	007	Permian	Well Site	Oil	Separator	Separator	Connectors	oil	y	n	0.00501271	768	1.00157	0.300762	yes	FID Only	Bacharach	n/a	Bacharach		70.99	10.335	9.353	1.343	0		0.07	0.301236
GHD0015	007	Gulf Coast	Well Site	Oil	Wellhead	Wellhead	Instrument	gas	y	n	0.00500265	50000	1.02674	0.300159	yes	FID Only	Bacharach	DPIR	Bacharach		80.846	11.775	3.722	0.417	0.07	0.015	0.07	0.308185
GHD0017	007	Gulf Coast	Boosting and Gathering	Gas	Separator	Separator	Vent	gas	n	y	0.0049789		1.01313	0.298734	yes	OGI Only	Bacharach	DPIR	Bacharach		81.153	10.797	3.293	0.509	0	0.096	0.07	0.302657
GHD0021	005	Gulf Coast	Boosting and Gathering	Oil	Flare	Other	Connectors	gas	y	n	0.00497529	30000	1.00616	0.298517	yes	FID Only	Bacharach	DPIR	Bacharach		87.4	6.5	2.2	0.385	0	0.0126	0.07	0.300358
GHD0021	005	Gulf Coast	Boosting and Gathering	Oil	Separator	Separator	Regulator	gas	y	n	0.00497529	26000	1.00616	0.298517	yes	FID Only	Bacharach	DPIR	Bacharach		87.4	6.5	2.2	0.385	0.02	0.03	0.07	0.300358
GHD0018	007	Gulf Coast	Central Production	Gas	Separator	Separator	Connectors	oil	y	n	0.00495432	2816	0.974389	0.297259	yes	FID Only	Bacharach	DPIR	Bacharach		88.392	4.452	1.024	0.385	0	0.008	0.07	0.289646
GHD0036	002	Anadarko	Well Production	Gas	Compressor	Compressor	Connectors	gas	y	n	0.00484022	10100	0.978597	0.290413	yes	FID Only	Bacharach	DPIR	Bacharach		95.37	0.62	0.06	0.01	0	0.0125	0.07	0.284197
GHD0038	002	Anadarko	Well Site	Gas	Separator	Separator	Connectors	gas	y	n	0.00479865	12000	1.02074	0.287919	yes	FID Only	Bacharach	DPIR	Bacharach		79.71	9.84	5.22	0.98	0	0.0235	0.07	0.29389
GHD0019	005	Gulf Coast	Well Site	Oil	Compressor	Compressor	Valves	gas	y	n	0.00475897	1349	1.00616	0.285538	yes	FID Only	Bacharach	DPIR	Bacharach		87.4	6.5	2.2	0.385	0	0.0024	0.07	0.287299
GHD0038	002	Anadarko	Well Site	Gas	Separator	Separator	Connectors	gas	y	n	0.00472703	680	1.02074	0.283622	yes	FID Only	Bacharach	DPIR	Bacharach		79.71	9.84	5.22	0.98	0	0.0065	0.07	0.289504
GHD0034	002	Anadarko	Well Site	Oil	Separator	Separator	Valves	gas	y	n	0.00469409	1500	1.00876	0.281646	no	FID Only	Bacharach	DPIR	Bacharach		78.96	9.31	5.15	1.19	0	0.0028	0.07	0.284114
GHD0043	001	Anadarko	Boosting and Gathering	Gas	Dehydrator	Dehydrator	Valves	gas	y	n	0.0046934	5289	0.8969	0.281604	yes	FID Only	Bacharach	DPIR	Bacharach		73.229	6.683	4.318	0.578	0	0.035	0.07	0.252571
GHD0036	002	Anadarko	Well Production	Gas	Compressor	Compressor	Regulator	gas	y	n	0.00469129	5030	0.978597	0.281477	yes	FID Only	Bacharach	DPIR	Bacharach		95.37	0.62	0.06	0.01	0	1	0.07	0.275453
GHD0021	005	Gulf Coast	Boosting and Gathering	Oil	Meters/Piping	Meters/Piping	Valves	gas	y	n	0.00468687	8428	1.00616	0.281212	yes	FID Only	Bacharach	DPIR	Bacharach		87.4	6.5	2.2	0.385	0	0.0015	0.07	0.282946
GHD0019	005	Gulf Coast	Well Site	Oil	Compressor	Compressor	Connectors	gas	y	n	0.00468687	1262	1.00616	0.281212	yes	FID Only	Bacharach	DPIR	Bacharach		87.4	6.5	2.2	0.385	0	0.0024	0.07	0.282946
GHD0005	003	San Juan	Central Production	Gas	Compressor	Compressor	OELs	gas	y	n	0.00468534	12840	1.00411	0.28112	yes	FID Only	Bacharach	Gas Sentry	Bacharach		89.4	4.944	2.053	0.3172	0	0	0.07	0.282275
GHD0005	003	San Juan	Central Production	Gas	Separator	Separator	Connectors	gas	y	n	0.00468534	23060	1.00411	0.28112	yes	FID Only	Bacharach	Gas Sentry	Bacharach		89.4	4.944	2.053	0.3172	0	0	0.07	0.282275
GHD0037	002	Anadarko	Well Site	Oil	Meters/Piping	Meters/Piping	Connectors	gas	n	y	0.0046592		1.01119	0.279552	yes	OGI Only	Bacharach	DPIR	Bacharach		80.1	9.14	4.82	1.03	0	0.0055	0.07	0.28268
GHD0018	007	Gulf Coast	Central Production	Gas	Separator	Separator	Connectors	oil	y	y	0.00464944	1827	0.974389	0.278966	yes	OGI and FID	Bacharach	DPIR	Bacharach		88.392	4.452	1.024	0.385	0	0.0597	0.07	0.271822
GHD0013	007	Gulf Coast	Well Site	Gas	Wellhead	Wellhead	Other	gas	y	n	0.00464522	2317	1.01872	0.278713	no	FID Only	Bacharach	DPIR	Bacharach		81.441	10.297	3.645	0.767	0	0.0024	0.07	0.283931
GHD0036	002	Anadarko	Well Production	Gas	Separator	Separator	Connectors	gas	y	n	0.00461682	1030	0.978597	0.277009	yes	FID Only	Bacharach	DPIR	Bacharach		95.37	0.62	0.06	0.01	0	0.0099	0.07	0.271081
GHD0036	002	Anadarko	Well Production	Gas	Separator	Separator	Connectors	oil	y	n	0.00461682	789	0.978597	0.277009	yes	FID Only	Bacharach	DPIR	Bacharach		95.37	0.62	0.06	0.01	0	0.06	0.07	0.271081
GHD0020	005	Gulf Coast	Central Production	Oil	Separator	Separator	Connectors	gas	y	n	0.00461476	1127	1.00616	0.276886	yes	FID Only	Bacharach	DPIR	Bacharach		87.4	6.5	2.2	0.385	0	0.0012	0.07	0.278593
GHD0061	007	Permian	Well Site	Oil	Storage Vessel	Other	OELs	gas	y	n	0.00457854	50000	0.914835	0.274712	yes	FID Only	Bacharach	Gas Rover	Gas Rover		70.99	10.335	9.353	1.343	0	0.0528	0.0528	0.251317
GHD0017	007	Gulf Coast	Boosting and Gathering	Gas	Separator	Separator	Connectors	gas	y	n	0.00454595	745	1.01313	0.272757	yes	FID Only	Bacharach	DPIR	Bacharach		81.153	10.797	3.293	0.509	0	0	0.07	0.276339
GHD0017	007	Gulf Coast	Boosting and Gathering	Gas	Fuel Gas Scrubber	MinorSeparator	Connectors	gas	y	n	0.00454595	4767	1.01313	0.272757	yes	FID Only	Bacharach	DPIR	Bacharach		81.153	10.797	3.293	0.509	0	0.0381	0.07	0.276339
GHD0019	005	Gulf Coast	Well Site	Oil	VRU	Compressor	Other	gas	y	n	0.00454266	1348	1.00616	0.272559	yes	FID Only	Bacharach	DPIR	Bacharach		87.4	6.5	2.2	0.385	0	0	0.07	0.27424
GHD0019	005	Gulf Coast	Well Site	Oil	Heater Treater	Heater Treater	Connectors	gas	y	n	0.00454266	18000	1.00616	0.272559	yes	FID Only	Bacharach	DPIR	Bacharach		87.4	6.5	2.2	0.385	0	0.0068	0.07	0.27424
GHD0061	007	Permian	Well Site	Oil	Heater Treater	Heater Treater	OELs	gas	y	n	0.00452936	40300	0.914835	0.271762	yes	FID Only	Bacharach	Gas Rover	Gas Rover		70.99	10.335	9.353	1.343	0.02	0.0615	0.0615	0.248617
GHD0027	007	Anadarko	Central Production	Gas	Meters/Piping	Meters/Piping	Valves	gas	y	y	0.00451511	4850	0.833522	0.270907	yes	OGI and FID	Bacharach	Gas Rover	Gas Rover		63.058	8.142	8.261	3.5481	0	0.044	0.044	0.225807
GHD0027	007	Anadarko	Central Production	Gas	Compressor	Compressor	Connectors	gas	y	n	0.00451511	4230	0.833522	0.270907	yes	FID Only	Bacharach	Gas Rover	Gas Rover		63.058	8.142	8.261	3.5481	0	0.044	0.044	0.225807
GHD0033	002	Anadarko	Well Site	Oil	Heater Treater	Heater Treater	Connectors	gas	y	n	0.00449991	2688	1.01341	0.269995	yes	FID Only	Bacharach	DPIR	Bacharach		79.89	8.95	5.3	1.03	0	0.0231	0.07	0.273616
GHD0017	007	Gulf Coast	Boosting and Gathering	Gas	Manifold Oil Line	Header	Connectors	oil	y	n	0.0044738	1030	1.01313	0.268428	yes	FID Only	Bacharach	DPIR	Bacharach		81.153	10.797	3.293	0.509	0	0.0015	0.07	0.271953
GHD0014	007	Gulf Coast	Central Production	Gas	Separator	Separator	Connectors	gas	y	y	0.00444641	2703	1.01183	0.266784	yes	OGI and FID	Bacharach	DPIR	Bacharach		77.921	11.873	4.74	0.376	0	0.0035	0.07	0.26994
GHD0017	007	Gulf Coast	Boosting and Gathering	Gas	Manifold Oil Line	Header	Connectors	oil	y	n	0.00440164	13000	1.01313	0.264098	yes	FID Only	Bacharach	DPIR	Bacharach		81.153	10.797	3.293	0.509	0	0.0139	0.07	0.267566
GHD0027	007	Anadarko	Central Production	Gas	Meters/Piping	Meters/Piping	Connectors	gas	y	n	0.0043966	650	0.833522	0.263796	yes	FID Only	Bacharach	Gas Rover	Gas Rover		63.058	8.142	8.261	3.5481	0	0.0468	0.0468	0.21988
GHD0032	004	Anadarko	Well Production	Gas	Heater Treater	Heater Treater	Connectors	gas	y	y	0.00433144	8840	1.05291	0.259887	yes	OGI and FID	Indaco HF	n/a	Indaco HF		87.521	5.426	2.474	0.75	0.1		0.1	0.273638
GHD0021	005	Gulf Coast	Boosting and Gathering	Oil	Separator	Separator	Valves	oil	y	n	0.00432634	3929	1.00616	0.25958	yes	FID Only	Bacharach	DPIR	Bacharach		87.4	6.5	2.2	0.385	0	0.0175	0.07	0.26118
GHD0038	002	Anadarko	Well Site	Gas	Separator	Separator	Valves	gas	y	n	0.0042973	14500	1.02074	0.257838	yes	FID Only	Bacharach	DPIR	Bacharach		79.71	9.84	5.22	0.98	0	0.0075	0.07	0.263185
GHD0060	007	Permian	Well Site	Oil	Separator	Separator	Connectors	gas	y	n	0.00429308	950	0.88979	0.257585	yes	FID Only	Bacharach	Gas Rover	Gas Rover		67.076	11.15	9.639	1.728	0	0.0496	0.0496	0.229196
GHD0013	007	Gulf Coast	Well Site	Gas	Pig Station	Meters/Piping	Connectors	oil	y	n	0.0042879	10800	1.01872	0.257274	yes	FID Only	Bacharach	DPIR	Bacharach		81.441	10.297	3.645	0.767	0	0.0064	0.07	0.26209
GHD0020	005	Gulf Coast	Central Production	Oil	Meters/Piping	Meters/Piping	Connectors	gas	y	n	0.00425423	1285	1.00616	0.255254	yes	FID Only	Bacharach	n/a	Bacharach		87.4	6.5	2.2	0.385	0		0.07	0.256827
GHD0043	001	Anadarko	Boosting and Gathering	Gas	Compressor	Compressor	Flange	gas	y	y	0.00423326	12600	0.8969	0.253996	yes	OGI and FID	Bacharach	n/a	Bacharach		73.229	6.683	4.318	0.578	0.06		0.07	0.227809
GHD0016	007	Gulf Coast	Well Site	Gas	Compressor	Compressor	Connectors	gas	y	n	0.00419762	1792	0.94509	0.251857	yes	FID Only	Bacharach	DPIR	Bacharach		87.418	3.131	0.937	0.268	0	0.0033	0.07	0.238028
GHD0019	005	Gulf Coast	Well Site	Oil	Pig Station	Meters/Piping	Other	gas	y	n	0.00418213	1291	1.00616	0.250928	yes	FID Only	Bacharach	DPIR	Bacharach		87.4	6.5	2.2	0.385	0.04	0.0056	0.07	0.252474
GHD0020	005	Gulf Coast	Central Production	Oil	Separator	Separator	Other	gas	y	n	0.00418213	3412	1.00616	0.250928	yes	FID Only	Bacharach	DPIR	Bacharach		87.4	6.5	2.2	0.385	0	0.0116	0.07	0.252474
GHD0005	003	San Juan	Central Production	Gas	Wellhead	Wellhead	Connectors	gas	y	n	0.00418076	11720	1.00411	0.250846	yes	FID Only	Bacharach	Gas Sentry	Bacharach		89.4	4.944	2.053	0.3172	0	0	0.07	0.251876
GHD0033	002	Anadarko	Well Site	Oil	Separator	Separator	Connectors	gas	y	n	0.00413702	13100	1.01341	0.248221	yes	FID Only	Bacharach	DPIR	Bacharach		79.89	8.95	5.3	1.03	0	0.0062	0.07	0.25155
GHD0033	002	Anadarko	Well Site	Oil	Wellhead	Wellhead	Valves	oil	y	n	0.00413702	7421	1.01341	0.248221	yes	FID Only	Bacharach	DPIR	Bacharach		79.89	8.95	5.3	1.03	0	0.0077	0.07	0.25155
GHD0037	002	Anadarko	Well Site	Oil	Wellhead	Wellhead	Connectors	gas	y	n	0.0040768	2341	1.01119	0.244608	yes	FID Only	Bacharach	DPIR	Bacharach		80.1	9.14	4.82	1.03	0	0.0071	0.07	0.247345
GHD0037	002	Anadarko	Well Site	Oil	Separator	Separator	Connectors	gas	y	n	0.0040768	2140	1.01119	0.244608	yes	FID Only	Bacharach	DPIR	Bacharach		80.1	9.14	4.82	1.03	0	0.0239	0.07	0.247345
GHD0017	007	Gulf Coast	Boosting and Gathering	Gas	Fuel Gas Scrubber	MinorSeparator	Connectors	gas	y	n	0.00396869	50000	1.01313	0.238121	yes	FID Only	Bacharach	DPIR	Bacharach		81.153	10.797	3.293	0.509	0	0.02	0.07	0.241248
GHD0019	005	Gulf Coast	Well Site	Oil	VRU	Compressor	Valves	gas	y	y	0.00396581	50000	1.00616	0.237949	yes	OGI and FID	Bacharach	DPIR	Bacharach		87.4	6.5	2.2	0.385	0	0.0006	0.07	0.239415
GHD0016	007	Gulf Coast	Well Site	Gas	Compressor	Compressor	Connectors	gas	y	n	0.00395545	1676	0.94509	0.237327	yes	FID Only	Bacharach	DPIR	Bacharach		87.418	3.131	0.937	0.268	0	0.0274	0.07	0.224295
GHD0035	002	Anadarko	Well Production	Gas	Wellhead	Wellhead	Connectors	gas	y	n	0.00393903	1296	1.0007	0.236342	yes	FID Only	Bacharach	DPIR	Bacharach		79.53	8.57	4.99	1.03	0	0.0058	0.07	0.236507
GHD0014	007	Gulf Coast	Central Production	Gas	Meters/Piping	Meters/Piping	OELs	gas	y	n	0.00393616	1475	1.01183	0.23617	yes	FID Only	Bacharach	DPIR	Bacharach		77.921	11.873	4.74	0.376	0	0.0081	0.07	0.238963
GHD0021	005	Gulf Coast	Boosting and Gathering	Oil	VRU	Compressor	Valves	gas	y	n	0.00389371	25000	1.00616	0.233622	yes	FID Only	Bacharach	DPIR	Bacharach		87.4	6.5	2.2	0.385	0	0.0183	0.07	0.235062
GHD0001	008	San Juan	Well Production	Gas	Wellhead	Wellhead	Connectors	gas	y	n	0.00387839	13300	0.997555	0.232704	yes	FID Only	Bacharach	DPIR	Bacharach		96.057	1.498	0.137	0.01	0	0.0162	0.07	0.232134
GHD0033	002	Anadarko	Well Site	Oil	Separator	Separator	Connectors	gas	y	n	0.0038467	2224	1.01341	0.230802	yes	FID Only	Bacharach	DPIR	Bacharach		79.89	8.95	5.3	1.03	0	0.0047	0.07	0.233897
GHD0021	005	Gulf Coast	Boosting and Gathering	Oil	Sweetener Scrubber	MinorSeparator	Pump	oil	y	n	0.0038216	1129	1.00616	0.229296	yes	FID Only	Bacharach	DPIR	Bacharach		87.4	6.5	2.2	0.385	0.04	0.0336	0.07	0.230709
GHD0033	002	Anadarko	Well Site	Oil	Heater Treater	Heater Treater	Connectors	gas	y	n	0.00377412	723	1.01341	0.226447	yes	FID Only	Bacharach	DPIR	Bacharach		79.89	8.95	5.3	1.03	0	0.0042	0.07	0.229484
GHD0037	002	Anadarko	Well Site	Oil	Separator	Separator	Connectors	gas	y	n	0.00364	1373	1.01119	0.2184	yes	FID Only	Bacharach	DPIR	Bacharach		80.1	9.14	4.82	1.03	0	0.0097	0.07	0.220843
GHD0021	005	Gulf Coast	Boosting and Gathering	Oil	Compressor	Compressor	Valves	gas	y	n	0.00360528	32000	1.00616	0.216317	yes	FID Only	Bacharach	DPIR	Bacharach		87.4	6.5	2.2	0.385	0	0.155	0.07	0.21765
GHD0019	005	Gulf Coast	Well Site	Oil	Fuel Gas Scrubber	MinorSeparator	Connectors	gas	y	n	0.00360528	4281	1.00616	0.216317	yes	FID Only	Bacharach	DPIR	Bacharach		87.4	6.5	2.2	0.385	0	0.0123	0.07	0.21765
GHD0027	007	Anadarko	Central Production	Gas	Compressor	Compressor	Connectors	gas	y	n	0.00343981	1105	0.833522	0.206389	yes	FID Only	Bacharach	Gas Rover	Gas Rover		63.058	8.142	8.261	3.5481	0	0.035	0.035	0.172029
GHD0015	007	Gulf Coast	Well Site	Oil	Separator	Separator	Connectors	gas	y	n	0.00338207	1702	1.02674	0.202924	yes	FID Only	Bacharach	DPIR	Bacharach		80.846	11.775	3.722	0.417	0	0.0023	0.07	0.208351
GHD0019	005	Gulf Coast	Well Site	Oil	Gas sweetener scrubber	MinorSeparator	Connector	gas	y	n	0.00331686	2519	1.00616	0.199012	yes	FID Only	Bacharach	DPIR	Bacharach		87.4	6.5	2.2	0.385	0	0.0043	0.07	0.200238
GHD0011	005	San Juan	Well Site	Oil	Heater Treater	Heater Treater	Connectors	gas	n/a	y	0.00322505		0.959534	0.193503	yes	OGI Only - No FID Survey	Indaco HF	n/a	Indaco HF		78.6	5.7	3.4	0.7135	0.05		0.05	0.185673
GHD0013	007	Gulf Coast	Well Site	Gas	Separator	Separator	Connectors	gas	y	n	0.00321592	1310	1.01872	0.192955	yes	FID Only	Bacharach	DPIR	Bacharach		81.441	10.297	3.645	0.767	0.01	0.04	0.07	0.196568
GHD0017	007	Gulf Coast	Boosting and Gathering	Gas	Separator	Separator	Connectors	gas	n	y	0.00317495		1.01313	0.190497	yes	OGI Only	Bacharach	DPIR	Bacharach		81.153	10.797	3.293	0.509	0	0.032	0.07	0.192999
GHD0031	004	Anadarko	Well Production	Gas	Separator	Separator	Connectors	gas	y	n	0.0031629	9100	0.954496	0.189774	yes	FID Only	Indaco HF	n/a	Indaco HF		74.518	8.438	6.551	0.772	0.05		0.05	0.181138
GHD0048	006	Gulf Coast	Well Production	Gas	Meters/Piping	Meters/Piping	Instrument	gas	y	n	0.00315212	50000	1.01676	0.189127	yes	FID Only	Bacharach	Gas Rover	Gas Rover		93.434	3.396	0.906	0.206	0	0.043	0.043	0.192297
GHD0027	007	Anadarko	Central Production	Gas	Meters/Piping	Meters/Piping	Connectors	gas	y	n	0.00309453	3932	0.833522	0.185672	yes	FID Only	Bacharach	Gas Rover	Gas Rover		63.058	8.142	8.261	3.5481	0	0.0351	0.0351	0.154761
GHD0010	005	San Juan	Well Site	Gas	Compressor	Compressor	Connectors	gas	y	n	0.00300109	50000	0.959534	0.180066	yes	FID Only	Indaco HF	n/a	Indaco HF		78.6	5.7	3.4	0.7135	0.05		0.05	0.172779
GHD0037	002	Anadarko	Well Site	Oil	Separator	Separator	Connectors	gas	y	n	0.0029848	13000	1.01119	0.179088	yes	FID Only	Bacharach	DPIR	Bacharach		80.1	9.14	4.82	1.03	0	0.0194	0.07	0.181092
GHD0029	004	Anadarko	Well Production	Gas	Separator	Separator	Flange	gas	y	n	0.00297075	580	1.0169	0.178245	yes	FID Only	Indaco HF	n/a	Indaco HF		79.371	11.191	4.021	0.916	0.05		0.05	0.181258
GHD0031	004	Anadarko	Well Production	Gas	Wellhead	Wellhead	Connectors	gas	y	n	0.00291571	50000	0.954496	0.174943	yes	FID Only	Indaco HF	n/a	Indaco HF		74.518	8.438	6.551	0.772	0.05		0.05	0.166982
GHD0032	004	Anadarko	Well Production	Gas	Heater Treater	Heater Treater	Connectors	gas	y	n	0.00290195	840	1.05291	0.174117	yes	FID Only	Indaco HF	n/a	Indaco HF		87.521	5.426	2.474	0.75	0.05		0.05	0.18333
GHD0049	006	Gulf Coast	Well Production	Gas	Separator	Separator	Valves	gas	n	y	0.00268634		1.02077	0.161181	yes	OGI Only	Bacharach	Gas Rover	Gas Rover		93.241	3.808	1.065	0.258	0	0.0415	0.0415	0.164529
GHD0061	007	Permian	Well Site	Oil	Separator	Separator	Valves	gas	y	n	0.00259764	4621	0.914835	0.155859	yes	FID Only	Bacharach	Gas Rover	Gas Rover		70.99	10.335	9.353	1.343	0	0.0308	0.0308	0.142585
GHD0056	007	Permian	Well Production	Oil	Separator	Separator	Valves	gas	y	n	0.00259267	28900	0.943549	0.15556	yes	FID Only	Bacharach	Gas Rover	Gas Rover		73.108	12.269	7.727	0.821	0	0.0333	0.0333	0.146779
GHD0027	007	Anadarko	Central Production	Gas	Compressor	Compressor	Other	gas	y	n	0.00255818	1024	0.833522	0.153491	yes	FID Only	Bacharach	Gas Rover	Gas Rover		63.058	8.142	8.261	3.5481	0	0.03	0.03	0.127938
GHD0006	003	San Juan	Well Site	Gas	Compressor	Compressor	Regulator	oil	y	n	0.00248347	50000	0.825158	0.149008	yes	FID Only	Bacharach	Gas Rover	Gas Rover		78.763	0.489	0.039	0.006	0	0.025	0.025	0.122955
GHD0061	007	Permian	Well Site	Oil	Separator	Separator	Flange	gas	y	n	0.00231932	50000	0.914835	0.139159	yes	FID Only	Bacharach	Gas Rover	Gas Rover		70.99	10.335	9.353	1.343	0	0.0275	0.0275	0.127308
GHD0055	007	Permian	Well Site	Oil	Meters/Piping	Meters/Piping	Valves	gas	y	n	0.00229853	878	0.91324	0.137912	yes	FID Only	Bacharach	Gas Rover	Gas Rover		67.299	13.158	9.631	1.6509	0	0.0393	0.0393	0.125947
GHD0048	006	Gulf Coast	Well Production	Gas	Meters/Piping	Meters/Piping	Connectors	gas	y	n	0.00227326	35100	1.01676	0.136396	yes	FID Only	Bacharach	Gas Rover	Gas Rover		93.434	3.396	0.906	0.206	0	0.0343	0.0343	0.138682
GHD0027	007	Anadarko	Central Production	Gas	Meters/Piping	Meters/Piping	Connectors	gas	y	n	0.00221651	2615	0.833522	0.132991	yes	FID Only	Bacharach	Gas Rover	Gas Rover		63.058	8.142	8.261	3.5481	0	0.0284	0.0284	0.11085
GHD0056	007	Permian	Well Production	Oil	Meters/Piping	Meters/Piping	Connectors	gas	y	n	0.00213737	34300	0.943549	0.128242	yes	FID Only	Bacharach	Gas Rover	Gas Rover		73.108	12.269	7.727	0.821	0	0.0287	0.0287	0.121003
GHD0027	007	Anadarko	Central Production	Gas	Meters/Piping	Meters/Piping	Connectors	gas	y	n	0.00170979	958	0.833522	0.102587	yes	FID Only	Bacharach	Gas Rover	Gas Rover		63.058	8.142	8.261	3.5481	0	0.0169	0.0169	0.0855087
GHD0048	006	Gulf Coast	Well Production	Gas	Meters/Piping	Meters/Piping	Valves	gas	y	y	0.00159805	50000	1.01676	0.095883	yes	OGI and FID	Bacharach	Gas Rover	Gas Rover		93.434	3.396	0.906	0.206	0	0.0218	0.0218	0.0974904
GHD0025	007	Anadarko	Well Site	Gas	Compressor	Compressor	PRVs	gas	n	y	0.00159771		0.792461	0.0958629	yes	OGI Only	Bacharach	Gas Rover	Gas Rover		62.933	6.535	6.485	2.5542	0.01	0.014	0.014	0.0759676
GHD0053	006	Gulf Coast	Central Production	Gas	Wellhead	Wellhead	OELs	gas	y	n	0.00157514	26400	1.00443	0.0945083	yes	FID Only	Bacharach	Gas Rover	Gas Rover		87.429	7.006	2.908	0.273	0	0.0297	0.0297	0.0949271
GHD0058	007	Permian	Well Site	Oil	Meters/Piping	Meters/Piping	Regulator	gas	y	n	0.00153668	2149	0.9094	0.0922008	yes	FID Only	Bacharach	Gas Rover	Gas Rover		71.019	10.03	9.115	1.252	0	0.0175	0.0175	0.0838475
GHD0052	006	Gulf Coast	Central Production	Gas	Separator	Separator	Connectors	gas	y	n	0.00142276	39600	1.00443	0.0853659	yes	FID Only	Bacharach	Gas Rover	Gas Rover		87.429	7.006	2.908	0.273	0	0.0225	0.0225	0.0857441
GHD0056	007	Permian	Well Production	Oil	Compressor	Compressor	Connectors	gas	y	n	0.00138621	2185	0.943549	0.0831727	yes	FID Only	Bacharach	Gas Rover	Gas Rover		73.108	12.269	7.727	0.821	0	0.0189	0.0189	0.0784775
GHD0027	007	Anadarko	Central Production	Gas	Meters/Piping	Meters/Piping	Connectors	gas	y	n	0.00137491	3215	0.833522	0.0824947	yes	FID Only	Bacharach	Gas Rover	Gas Rover		63.058	8.142	8.261	3.5481	0	0.0151	0.0151	0.0687611
GHD0027	007	Anadarko	Central Production	Gas	Meters/Piping	Meters/Piping	Connectors	gas	y	n	0.00136349	1512	0.833522	0.0818097	yes	FID Only	Bacharach	Gas Rover	Gas Rover		63.058	8.142	8.261	3.5481	0	0.0178	0.0178	0.0681901
GHD0051	006	Gulf Coast	Well Site	Gas	Wellhead	Wellhead	Connectors	gas	y	n	0.00134602	750	1.01676	0.0807611	yes	FID Only	Bacharach	Gas Rover	Gas Rover		94.674	2.441	0.63	0.13	0	0.0285	0.0285	0.0821149
GHD0056	007	Permian	Well Production	Oil	Heater Treater	Heater Treater	Connectors	gas	y	n	0.00102818	26300	0.943549	0.0616906	yes	FID Only	Bacharach	Gas Rover	Gas Rover		73.108	12.269	7.727	0.821	0	0.0134	0.0134	0.0582081
GHD0059	007	Permian	Well Production	Oil	Separator	Separator	Connectors	gas	y	n	0.000905357	9800	0.934937	0.0543214	yes	FID Only	Bacharach	Gas Rover	Gas Rover		71.494	12.846	7.701	0.959	0	0.0123	0.0123	0.0507871
GHD0049	006	Gulf Coast	Well Production	Gas	Liquid Piping Manifold Conductor	Header	Connectors	gas	y	n	0.00087387	19500	1.02077	0.0524322	yes	FID Only	Bacharach	Gas Rover	Gas Rover		93.241	3.808	1.065	0.258	0	0.0225	0.0225	0.0535213
GHD0050	006	Gulf Coast	Well Production	Gas	Compressor	Compressor	Valves	gas	y	n	0.000840517	2942	1.02111	0.050431	yes	FID Only	Bacharach	Gas Rover	Gas Rover		95.974	1.775	0.5	0.043	0	0.0111	0.0111	0.0514955
GHD0060	007	Permian	Well Site	Oil	Separator	Separator	Connectors	gas	y	n	0.000827909	2000	0.88979	0.0496745	yes	FID Only	Bacharach	Gas Rover	Gas Rover		67.076	11.15	9.639	1.728	0	0.0088	0.0088	0.0441999
GHD0059	007	Permian	Well Production	Oil	Compressor	Compressor	Connectors	gas	y	n	0.000742963	9100	0.934937	0.0445778	yes	FID Only	Bacharach	Gas Rover	Gas Rover		71.494	12.846	7.701	0.959	0	0.0095	0.0095	0.0416774
GHD0056	007	Permian	Well Production	Oil	Separator	Separator	Valves	gas	y	y	0.000731865	50000	0.943549	0.0439119	yes	OGI and FID	Bacharach	Gas Rover	Gas Rover		73.108	12.269	7.727	0.821	0	0.0094	0.0094	0.0414331
GHD0056	007	Permian	Well Production	Oil	Meters/Piping	Meters/Piping	Regulator	gas	y	y	0.000667548	3143	0.943549	0.0400529	yes	OGI and FID	Bacharach	Gas Rover	Gas Rover		73.108	12.269	7.727	0.821	0	0.0087	0.0087	0.0377919
GHD0029	004	Anadarko	Well Production	Gas	Storage Vessel	Other	Connectors	gas	y	n	0.000519147	1600	0.980978	0.0311488	yes	FID Only	Indaco HF	Gas Rover	Gas Rover		79.371	11.191	4.021	0.916	0	0.0091	0.0091	0.0305563
GHD0059	007	Permian	Well Production	Oil	Separator	Separator	OELs	gas	y	n	0.000512139	5550	0.934937	0.0307283	yes	FID Only	Bacharach	Gas Rover	Gas Rover		71.494	12.846	7.701	0.959	0	0.0061	0.0061	0.028729
GHD0006	003	San Juan	Well Site	Gas	Separator	Separator	Connectors	oil	y	n	0.000511978	732	0.825158	0.0307187	yes	FID Only	Bacharach	Gas Rover	Gas Rover		78.763	0.489	0.039	0.006	0	0	0.005	0.0253477
GHD0059	007	Permian	Well Production	Oil	Heater Treater	Heater Treater	Connectors	gas	y	n	0.000491667	962	0.934937	0.0295	yes	FID Only	Bacharach	Gas Rover	Gas Rover		71.494	12.846	7.701	0.959	0	0.0075	0.0075	0.0275806
GHD0028	004	Anadarko	Well Production	Oil	Flare	Other	Connectors	gas	y	n	0.000480888	2100	1.05111	0.0288533	yes	FID Only	Indaco HF	TVA	Indaco HF		84.454	9.605	2.679	0.543	0.006386	0.006386	0.006386	0.0303279
GHD0030	004	Anadarko	Well Production	Gas	Separator	Separator	Connectors	gas	y	n	0.000476156	880	1.02573	0.0285694	yes	FID Only	Indaco HF	TVA	Indaco HF		80.049	11.529	3.965	0.748	0	0.001	0.005	0.0293046
GHD0027	007	Anadarko	Central Production	Gas	Meters/Piping	Meters/Piping	Connectors	gas	y	n	0.000455269	1785	0.833522	0.0273161	yes	FID Only	Bacharach	Gas Rover	Gas Rover		63.058	8.142	8.261	3.5481	0	0.0039	0.005	0.0227686
GHD0071	003	Permian	Well Site	Oil	Wellhead	Wellhead	Connectors	oil	y	n	0.000434027	4000	0.824163	0.0260416	yes	FID Only	Bacharach	Gas Rover	Gas Rover		56.607	13.991	11.21	2.059	0	0	0.005	0.0214626
GHD0056	007	Permian	Well Production	Oil	Heater Treater	Heater Treater	Connectors	gas	y	n	0.000415807	3199	0.943549	0.0249484	yes	FID Only	Bacharach	Gas Rover	Gas Rover		73.108	12.269	7.727	0.821	0	0.0055	0.0055	0.0235401
GHD0059	007	Permian	Well Production	Oil	Separator	Separator	Valves	gas	n	y	0.000414035		0.934937	0.0248421	yes	OGI Only	Bacharach	Gas Rover	Gas Rover		71.494	12.846	7.701	0.959	0	0.0047	0.005	0.0232258
GHD0028	004	Anadarko	Well Production	Oil	Separator	Separator	Connectors	gas	y	n	0.000403543	6650	1.05111	0.0242126	yes	FID Only	Indaco HF	TVA	Indaco HF		84.454	9.605	2.679	0.543	0	0.003265	0.005	0.0254501
GHD0050	006	Gulf Coast	Well Production	Gas	Compressor	Compressor	Connectors	gas	y	n	0.000398538	1502	1.02111	0.0239123	yes	FID Only	Bacharach	Gas Rover	Gas Rover		95.974	1.775	0.5	0.043	0	0.0015	0.005	0.024417
GHD0059	007	Permian	Well Production	Oil	Heater Treater	Heater Treater	Regulator	gas	y	n	0.000396784	2160	0.934937	0.023807	yes	FID Only	Bacharach	Gas Rover	Gas Rover		71.494	12.846	7.701	0.959	0	0.0016	0.005	0.0222581
GHD0056	007	Permian	Well Production	Oil	Meters/Piping	Meters/Piping	Regulator	gas	y	y	0.000394932	50000	0.943549	0.0236959	yes	OGI and FID	Bacharach	Gas Rover	Gas Rover		73.108	12.269	7.727	0.821	0	0.003	0.005	0.0223583
GHD0056	007	Permian	Well Production	Oil	Meters/Piping	Meters/Piping	Regulator	gas	y	y	0.00038929	2180	0.943549	0.0233574	yes	OGI and FID	Bacharach	Gas Rover	Gas Rover		73.108	12.269	7.727	0.821	0	0.0003	0.005	0.0220389
GHD0048	006	Gulf Coast	Well Production	Gas	Wellhead	Wellhead	Connectors	gas	y	n	0.000386609	3492	1.01676	0.0231965	yes	FID Only	Bacharach	Gas Rover	Gas Rover		93.434	3.396	0.906	0.206	0	0.0045	0.005	0.0235854
GHD0049	006	Gulf Coast	Well Production	Gas	Dehydrator	Dehydrator	Connectors	gas	y	n	0.000383407	5166	1.02077	0.0230044	yes	FID Only	Bacharach	Gas Rover	Gas Rover		93.241	3.808	1.065	0.258	0	0.0045	0.005	0.0234823
GHD0056	007	Permian	Well Production	Oil	Meters/Piping	Meters/Piping	Regulator	gas	y	n	0.000378006	1182	0.943549	0.0226804	yes	FID Only	Bacharach	Gas Rover	Gas Rover		73.108	12.269	7.727	0.821	0	0	0.005	0.0214001
GHD0056	007	Permian	Well Production	Oil	Meters/Piping	Meters/Piping	Connectors	gas	y	n	0.000378006	1860	0.943549	0.0226804	yes	FID Only	Bacharach	Gas Rover	Gas Rover		73.108	12.269	7.727	0.821	0	0.0044	0.005	0.0214001
GHD0048	006	Gulf Coast	Well Production	Gas	Wellhead	Wellhead	OELs	gas	y	n	0.000366525	2791	1.01676	0.0219915	yes	FID Only	Bacharach	Gas Rover	Gas Rover		93.434	3.396	0.906	0.206	0	0	0.005	0.0223602
GHD0048	006	Gulf Coast	Well Production	Gas	Wellhead	Wellhead	Connectors	gas	y	n	0.000356484	28000	1.01676	0.021389	yes	FID Only	Bacharach	Gas Rover	Gas Rover		93.434	3.396	0.906	0.206	0	0	0.005	0.0217476
GHD0048	006	Gulf Coast	Well Production	Gas	Contactor	Dehydrator	Connectors	gas	y	n	0.000351463	20400	1.01676	0.0210878	yes	FID Only	Bacharach	Gas Rover	Gas Rover		93.434	3.396	0.906	0.206	0	0	0.005	0.0214413
GHD0061	007	Permian	Well Site	Oil	Heater Treater	Heater Treater	Connectors	gas	y	n	0.000344483	2873	0.914835	0.020669	yes	FID Only	Bacharach	Gas Rover	Gas Rover		70.99	10.335	9.353	1.343	0	0.0049	0.005	0.0189087
GHD0049	006	Gulf Coast	Well Production	Gas	Separator	Separator	Valves	gas	y	n	0.000343573	691	1.02077	0.0206144	yes	FID Only	Bacharach	Gas Rover	Gas Rover		93.241	3.808	1.065	0.258	0	0	0.005	0.0210426
GHD0031	004	Anadarko	Well Production	Gas	Storage Vessel	Other	Connectors	gas	y	n	0.000328649	1100	0.954496	0.0197189	yes	FID Only	Indaco HF	n/a	Indaco HF		74.518	8.438	6.551	0.772	0		0.005	0.0188217
GHD0052	006	Gulf Coast	Central Production	Gas	Separator	Separator	Connectors	gas	y	n	0.000326369	37500	1.00443	0.0195821	yes	FID Only	Bacharach	Gas Rover	Gas Rover		87.429	7.006	2.908	0.273	0	0.0031	0.005	0.0196689
GHD0048	006	Gulf Coast	Well Production	Gas	Pig Station	Meters/Piping	OELs	gas	y	n	0.000316316	1117	1.01676	0.018979	yes	FID Only	Bacharach	Gas Rover	Gas Rover		93.434	3.396	0.906	0.206	0	0.0025	0.005	0.0192971
GHD0031	004	Anadarko	Well Production	Gas	Meters/Piping	Meters/Piping	Connectors	gas	y	n	0.00031629	670	0.954496	0.0189774	yes	FID Only	Indaco HF	TVA	Indaco HF		74.518	8.438	6.551	0.772	0	0.0022	0.005	0.0181138
GHD0009	005	San Juan	Well Site	Gas	Compressor	Compressor	Connectors	gas	y	n	0.000315904	5431	0.959534	0.0189543	yes	FID Only	Indaco HF	n/a	Indaco HF		78.6	5.7	3.4	0.7135	0		0.005	0.0181873
GHD0030	004	Anadarko	Well Production	Gas	Wellhead	Wellhead	Valves	gas	y	n	0.000310153	708	1.02573	0.0186092	yes	FID Only	Indaco HF	TVA	Indaco HF		80.049	11.529	3.965	0.748	0	0.0014	0.005	0.0190881
GHD0029	004	Anadarko	Well Production	Gas	Separator	Separator	Connectors	gas	y	n	0.000286263	1500	1.0169	0.0171758	yes	FID Only	Indaco HF	n/a	Indaco HF		79.371	11.191	4.021	0.916	0		0.005	0.0174662
GHD0049	006	Gulf Coast	Well Production	Gas	Meters/Piping	Meters/Piping	Connectors	gas	y	n	0.000278842	1162	1.02077	0.0167305	yes	FID Only	Bacharach	Gas Rover	Gas Rover		93.241	3.808	1.065	0.258	0	0	0.005	0.017078
GHD0029	004	Anadarko	Well Production	Gas	Separator	Separator	Connectors	gas	y	y	0.000274936	2800	1.0169	0.0164962	yes	OGI and FID	Indaco HF	n/a	Indaco HF		79.371	11.191	4.021	0.916	0		0.005	0.016775
GHD0029	004	Anadarko	Well Production	Gas	Wellhead	Wellhead	Connectors	gas	y	n	0.000269788	4800	1.0169	0.0161873	yes	FID Only	Indaco HF	n/a	Indaco HF		79.371	11.191	4.021	0.916	0		0.005	0.0164609
GHD0030	004	Anadarko	Well Production	Gas	Separator	Separator	Connectors	gas	y	n	0.000268904	3000	1.02573	0.0161343	yes	FID Only	Indaco HF	TVA	Indaco HF		80.049	11.529	3.965	0.748	0	0.0019	0.005	0.0165495
GHD0048	006	Gulf Coast	Well Production	Gas	Wellhead	Wellhead	Other	gas	y	n	0.000266107	26200	1.01676	0.0159664	yes	FID Only	Bacharach	Gas Rover	Gas Rover		93.434	3.396	0.906	0.206	0	0	0.005	0.0162341
GHD0029	004	Anadarko	Well Production	Gas	Separator	Separator	Connectors	gas	y	n	0.000255237	610	0.980978	0.0153142	yes	FID Only	Indaco HF	Gas Rover	Gas Rover		79.371	11.191	4.021	0.916	0	0.0072	0.0072	0.0150229
GHD0029	004	Anadarko	Well Production	Gas	Separator	Separator	Connectors	gas	y	n	0.000252797	590	1.0169	0.0151678	yes	FID Only	Indaco HF	n/a	Indaco HF		79.371	11.191	4.021	0.916	0		0.005	0.0154242
GHD0030	004	Anadarko	Well Production	Gas	Separator	Separator	Connectors	gas	y	n	0.000252531	658	1.02573	0.0151518	yes	FID Only	Indaco HF	TVA	Indaco HF		80.049	11.529	3.965	0.748	0	0.0018	0.005	0.0155418
GHD0048	006	Gulf Coast	Well Production	Gas	Discharge Piping	Meters/Piping	OELs	gas	y	n	0.000241003	1545	1.01676	0.0144602	yes	FID Only	Bacharach	Gas Rover	Gas Rover		93.434	3.396	0.906	0.206	0	0.0034	0.005	0.0147026
GHD0012	005	San Juan	Well Site	Oil	Meters/Piping	Meters/Piping	Connectors	gas	n/a	y	0.000190957		0.959534	0.0114574	yes	OGI Only - No FID Survey	Indaco HF	n/a	Indaco HF		78.6	5.7	3.4	0.7135	0		0.005	0.0109938
GHD0010	005	San Juan	Well Site	Gas	Wellhead	Wellhead	Valves	gas	y	n	0.000100194	4500	0.959534	0.00601162	yes	FID Only	Indaco HF	n/a	Indaco HF		78.6	5.7	3.4	0.7135	0		0.005	0.00576835
